1                   **Encoding of hunger by the neuronal epigenome slows aging in *Drosophila***

2

3                   KJ Weaver<sup>1\*</sup>, RA Holt<sup>2</sup>, E Henry<sup>3</sup>, SD Pletcher<sup>1\*</sup>

4

5   <sup>1</sup>Department of Molecular and Integrative Physiology and Geriatrics Center, Biomedical

6   Sciences and Research Building, University of Michigan; Ann Arbor, MI 48109, U.S.A.

7   <sup>2</sup>College of Literature, Science, and the Arts, Biomedical Sciences and Research Building,

8   University of Michigan; Ann Arbor, MI 48109, U.S.A.

9   <sup>3</sup>Program in Cellular and Molecular Biology, University of Michigan; Ann Arbor, MI 48109,

10   U.S.A.

11

12   \*Corresponding authors. Email: [spletch@umich.edu](mailto:spletch@umich.edu), [kjweaver@umich.edu](mailto:kjweaver@umich.edu)

13

14

15

16 **Abstract:** Hunger is, by necessity, an ancient motivational drive, yet the molecular nature of  
17 homeostatic pressures of this sort and how they modulate health and physiology are largely  
18 unknown. Here we show that the molecular encoding of hunger slows aging in *Drosophila*. We  
19 identify the branched-chain amino acids (BCAAs) as dietary hunger signals that extend lifespan  
20 despite increasing food intake when reduced, and in parallel show that optogenetic activation of  
21 a subset of hunger-promoting neurons is sufficient to recapitulate these effects. We find that  
22 remodeling of the neuronal histone acetylome is associated with dietary BCAA reduction, and  
23 that this requires BCAA metabolism in specific subsets of neurons. Preventing the histone  
24 acetylome from being molded by dietary BCAAs abrogates both increased feeding and extended  
25 lifespan. However, the mechanisms that promote feeding and modulate aging downstream of  
26 alterations in histone acetylation occur through spatially and temporally distinct responses;  
27 differential usage of the histone variant H3.3A in the brain is an acute response to hunger that  
28 promotes increased feeding without modulating lifespan, while a prolonged experience of hunger  
29 may slow aging by promoting a beneficial decrease of a set-point around which hunger levels are  
30 regulated. Identification of a molecular basis for the encoding of hunger and demonstration of its  
31 sufficiency in extending lifespan reveals that motivational states alone are deterministic drivers  
32 of aging and behavior.

33

34

35

36

37

## 38 **Introduction**

39 The relationship between an animal and its diet influences behavior and aging in remarkable  
40 ways. The physiological need for nutrients motivates animals to forage and feed, and forced  
41 limitation in food availability slows aging across taxa(1). Both effects derive not only from the  
42 energetic content of the diet but also its composition(2-4). Many animals eat until they have  
43 consumed a specific amount of protein, for example, and the protein:carbohydrate ratio that  
44 results in part from seeking this target is a major factor in modulating lifespan(5). Remarkably,  
45 an animal need not consume its diet to be affected by it. In mice, appetite is promoted by  
46 environmental cues that predict future food consumption, presumably by influencing broader  
47 neural states that specify nutrient-specific drive, or hunger(6, 7). Similarly, the taste and smell of  
48 specific nutrients modulate lifespan in, among other species, the fruit fly, *Drosophila*  
49 *melanogaster*, and the nematode, *Caenorhabditis elegans*(8-11).

50  
51 It seems likely that the effects of diet on aging and behavior share mechanistic foundations in the  
52 motivational states they promote, yet little is known about the molecular nature of these states.  
53 Many animals, including humans, develop a motivational drive for protein, which has also been  
54 described in *Drosophila* in response to starvation and mating(12-14). The existence of this drive  
55 and its ability to influence physiology is demonstrated by the observation that perception of  
56 protein-containing food without its consumption reverses the beneficial effects of protein-  
57 restricted diets in *Drosophila* and *C. elegans*. (11, 15, 16). Serotonin, together with neurons that  
58 express a specific serotonin receptor (5-HT<sub>2A</sub>), modulate this hunger state, and loss of 5-HT<sub>2A</sub>  
59 increases lifespan up to 50% in nutrient-rich conditions(17). Observations like these led us to  
60 consider the hypothesis that the neural states that encode the motivation to seek food and that

61 define hunger *per se* may be sufficient to slow aging, independent of any changes in nutrient  
62 intake that may result.

63  
64 Here we establish that hunger modulates aging in *Drosophila* and demonstrate that epigenomic  
65 encoding of this motivational state promotes feeding and modulates lifespan through partially  
66 distinct downstream mechanisms. We show that two models of hungry flies – by reducing  
67 dietary branched-chain amino acids or by activation of neurons that evoke hunger - are long-  
68 lived, despite consuming more calories and total protein. We establish that specific subsets of  
69 *Drosophila* neurons use BCAA metabolism to promote the decoration of histone tails with  
70 acetylation marks in the brain; a plasticity that is required to encode hunger in these models.  
71 Finally, we present evidence to suggest that prolonged hunger alters a set-point around which  
72 appetite is regulated and that this adaptation is an important component of a slowed aging  
73 process.

74

## 75 **Results**

76 To investigate how neural states motivate feeding and modulate aging, we focused our  
77 investigations on the branched-chain amino acids (BCAAs) primarily because reducing them in  
78 the diets of mammals and flies increases protein appetite and extends lifespan(18, 19). We used a  
79 chemically defined diet to titrate and manipulate the BCAAs without altering other dietary  
80 components(20). We first designed a reference holidic diet (RD), around which we were able to  
81 manipulate BCAAs within a range of concentrations consistent with standard diets used for  
82 *Drosophila* aging studies that ensure against mal- and over-nutrition. We enforced equal  
83 concentrations of all other non-essential amino acids and non-BCAA essential amino acids

84 across diets, which allowed us to study the effects of BCAAs without the confounding effects of  
85 general amino acid deficiency that are mediated by well-described mechanisms (Fig. 1A)(13, 21-  
86 23). This led to diets of modestly different caloricity. However, caloric content has been shown  
87 to be less impactful than dietary composition in modulating lifespan and subsequent experiments  
88 ruled out differences in calories as a cause of the dietary effects we observed(2).  
89  
90 Consistent with previous reports, dietary BCAA concentration modulated fly lifespan(19, 24)  
91 (Fig. 1B). Lifespan extension was larger in female flies and was maximized on a diet containing  
92 roughly 1/3<sup>rd</sup> of the BCAA content of the reference diet, which is consistent with lifespan  
93 extension observed with dilution of the standard laboratory diet (Fig. 1B, Fig. 1C, Fig. S1A)(2,  
94 3). We subsequently focused our investigation using female flies because of their known,  
95 heightened lifespan and neuronal responses to protein availability, which we also observed(25,  
96 26). We chose two diets from the range of those initially tested, hereafter termed “low -BCAA”  
97 (8mM BCAAs/5.6% w/v total amino acid) and “high-BCAA” (44mM BCAAs/7.2% w/v total  
98 amino acid), to investigate in detail.  
99  
100 Dietary BCAAs also modulated food intake. Using a method that determines how much volume  
101 a group of flies consume in 24 hours by feeding them on blue-dyed food and then collecting their  
102 excretions (termed “Con-Ex” for Consumption-Excretion)(27, 28), we found that flies on low-  
103 BCAA diets consumed more food volume compared to those on high-BCAA diets (Fig. 1D, left  
104 panel). This was due to an increase in food intake by flies on low-BCAA diets rather than a  
105 decrease by flies on high-BCAA diets because food intake was also increased compared to flies  
106 on our RD (Fig. S1B). Differences were unlikely a result of food taste; *Pox-Neuro* flies who have

107 extreme deficits in chemosensation also consumed more food on low-BCAA diets (Fig. 1D, right  
108 panel). Increased volume intake by flies on low-BCAA diets resulted in significantly higher  
109 caloric intake (Fig. 1E) but in similar amounts of total amino acids (ug/fly) eaten between flies  
110 fed low- or high-BCAA diets (Fig. 1F, left panel), while BCAA intake was significantly reduced  
111 (ug/fly) for flies fed the low-BCAA diet (Fig. 1F, right panel). Thus, flies fed our low-BCAA  
112 diet consumed more calories and similar amounts of total amino acids yet lived significantly  
113 longer.

114

### 115 **Dietary BCAAs influence hunger states**

116 The relative increase in food intake we observed when flies live on low-BCAA diets led us to  
117 speculate that reducing dietary BCAAs created a food environment that promoted a heightened  
118 and persistent state of hunger. Measuring hunger can be challenging in a simple model system;  
119 animals eat for many reasons, and total food intake on homogenous mixtures of nutrients may  
120 not be as indicative of hunger levels as feeding paradigms that quantify precisely when and how  
121 often individual animals interact with specific food sources(6, 13, 17, 29, 30). We therefore  
122 devised a refeeding assay to determine how BCAAs influence hunger. In this paradigm, starved  
123 flies are refed a measured 3-hour bolus of test food, such as low- or high-BCAA, and are then  
124 placed into a common food environment (termed “common garden”) where we measure food  
125 interactions using the Fly Liquid Food Interaction Counter (FLIC)(31) (Fig. 1G, Experiment 1,  
126 top panel). We reasoned that if BCAAs did influence a state of hunger, then manipulating their  
127 concentration in the test food during refeeding would alter future food interactions during  
128 assessment in the common garden.

129

130 We observed that flies refeed a low-BCAA diet subsequently interacted more often with the  
131 sucrose/yeast food in the common garden than did flies refeed a high-BCAA diet and, in fact,  
132 interacted as frequently as did flies that were not refeed at all (Fig. 1H). This was not due to a  
133 reduction in total calories or amino acids consumed during the refeeding period: flies ingested  
134 significantly more food volume and also more calories, as measured by Con-Ex, when refeeding  
135 on a diet of low-BCAAs than they did when refeeding on a high-BCAA diet (Fig. 1I), although  
136 total amino acid intake (ug/fly) was indistinguishable from flies refeed high-BCAAs and BCAA  
137 consumption (ug/fly) was significantly less (Fig. S1C).

138  
139 While the three BCAAs are commonly investigated together because they share similarities in  
140 their biochemical structures and functions, we next tested them individually for their role in  
141 promoting feeding. We measured food intake after reduction of each BCAA from the high-  
142 BCAA diet and found that decreasing isoleucine, but not valine or leucine or other pairwise  
143 combinations of amino acids, was required to increase feeding in the 24hr ConEx assay (Fig. 1J,  
144 Fig. S1D, S1E). Reducing dietary isoleucine increased the total calories consumed (Fig. S1E)  
145 and was the only dietary manipulation that we observed as sufficient to promote increased total  
146 amino acid intake (Fig. S1D). Furthermore, increasing isoleucine alone from our low-BCAA diet  
147 to match the concentration in our high-BCAA diet was sufficient to decrease food intake (Fig.  
148 1J), demonstrating that isoleucine acts as a dietary signal to modulate feeding.

149  
150 Having established that isoleucine was sufficient to modulate volumetric food intake, we next  
151 returned to our refeeding paradigm to determine how nutrient-specific drives may be affected by  
152 this amino acid using the FLIC to measure behavior in a food-choice environment. Choices

153 between carbohydrate- or protein-rich food are thought to be tuned by increased protein demand  
154 in starved animals, who exhibit a robust increase in interactions with protein-rich food compared  
155 to carbohydrate-rich food, and to serve as a useful proxy for measuring protein-specific  
156 hunger(31-33). We reasoned that if isoleucine has a specific influence on protein hunger, then  
157 manipulating its concentration in the test food during refeeding would be expected to alter future  
158 choices between protein or carbohydrate food during the subsequent assessment period. For  
159 these experiments, we allowed flies a bolus of refeeding for three hours on either conventional  
160 10% sugar-yeast food or the same food to which we added 1% isoleucine. We then measured  
161 over the next 24hrs the frequency of individual fly interactions with either carbohydrate- or  
162 protein-rich food in the choice environment (Fig. 1G, Experiment 2, bottom panel). Control flies  
163 that were refed conventional sugar-yeast food exhibited more interactions with protein-rich food  
164 compared to the carbohydrate-rich food, establishing that the three hours of refeeding before the  
165 test period were insufficient to fully satiate the animals and that they maintained a heightened  
166 level of protein drive (Fig. 1K, top). On the other hand, flies that were refed food with added  
167 isoleucine had statistically indistinguishable interactions with carbohydrate- compared to  
168 protein-rich food (Fig. 1K, bottom). Thus, levels of dietary isoleucine modulate protein-specific  
169 appetite, suggesting that our low-BCAA diet could promote a heightened state of hunger,  
170 perhaps by influencing protein drive.

171

## 172 **Hunger states influence lifespan**

173 We next asked whether restriction of isoleucine alone was capable of increasing lifespan. We  
174 reduced all BCAAs or just isoleucine from our reference diet and found that isoleucine reduction  
175 (but not valine or threonine) was sufficient to extend lifespan to a similar degree as reducing all



176 BCAAs, despite increased intake of calories, total amino acids, and carbohydrates (Fig. 1L, Fig.  
177 S1F). This observation is consistent with our conjecture that the motivational state of hunger  
178 itself, rather than the availability or energetic characteristics of the diet, might slow aging.  
179 Further support for this idea was provided by the observations that our diets did not have  
180 significant effects on egg laying, activity levels, triglyceride and protein levels, and activation of  
181 mTOR/AKT pathways (Figs. S2, A-E), which are commonly associated with manipulations that  
182 modulate lifespan through changes in nutrient availability or toxicity.

183  
184 To determine whether hunger itself might slow aging, we sought a way to induce it independent  
185 of dietary manipulations and examine its effect on lifespan. Neurons whose activity evokes  
186 hunger in the fly have been described, but their role in modulating lifespan has not been  
187 examined(34). These neurons can be manipulated by using flies that express the GAL4  
188 transgenic activator under the R50H05 driver (R50H05-GAL4). By targeting expression of the  
189 light-sensitive cation channel CsChrimson to these neurons, we created flies in which R50  
190 hunger neurons were optogenetically activated at will to artificially generate hunger and to  
191 increase feeding when adult flies were exposed to red light. We observed that these flies  
192 consumed twice as much food as did flies of the same genotype that were kept in the dark or that  
193 expressed a green-light sensitive opsin channel (GTACR), consistent with prior reports (Fig.  
194 1M). Remarkably, we also found that inducing a heightened state of hunger by activating these  
195 neurons for 12 hours each day during the light period significantly extended lifespan relative to a  
196 genetic control strain, which was not observed in the dark where flies are modestly long-lived in  
197 general – a known phenomenon that has been reported by our lab and others (Fig. 1N, Fig. S3).  
198 We interpreted this as a stark confirmation of our conjecture that hunger itself slows aging.

199

## 200 **Molecular encoding of hunger by the neuronal epigenome**

201 We next turned to defining the molecular interactions among BCAAs, hunger neurons, and the  
202 brain to determine how hunger might be molecularly encoded. Our attention was drawn to the  
203 epigenome because alterations in histone proteins are involved in the generation of motivated  
204 behaviors, are a hallmark of aging, and are regulated by nutrients(35-38). Furthermore, histone  
205 acetylation is especially sensitive to the availability of dietary nutrients that generate acetyl-CoA,  
206 and BCAAs and isoleucine specifically are metabolically fated to produce this substrate(39, 40).

207

208 We first examined whether dietary BCAAs influenced relevant histone post-translational  
209 modifications. We found that histone H3K9 acetylation was significantly decreased in fly heads  
210 within one week of feeding a low-BCAA diet (Fig. 2A). Subsequent experiments revealed that  
211 H3K27 acetylation, but not H3K9 methylation, was also reduced when flies were fed low-BCAA  
212 diets. All significant effects of dietary BCAAs on histone PTMs were abrogated by feeding flies  
213 the histone deacetylase inhibitor, sodium butyrate (Fig. 2C). We also observed an unexpected  
214 decrease in total histone H3 abundance in heads and brains, although H3 mRNA was increased  
215 (Fig. 2A-C, Fig. S4). The significant decrease in total histone H3 was independent of changes in  
216 histone H4, which were statistically non-significant between diets (Fig. 2D). Inducing hunger  
217 independent of diet by activation of R50 hunger neurons also reduced histone H3 abundance in  
218 fly heads (Fig. 2E), and reducing isoleucine alone, which was important for modulating feeding  
219 and lifespan (e.g., Fig. 1), partially recapitulated the effects of BCAAs on histone H3 abundance,  
220 suggesting that epigenetic changes may be causally linked to one or both hunger phenotypes  
221 (Fig. 2D).

222  
223 We next focused on the unexpected finding that histone H3 abundance was reduced by low-  
224 BCAA diets. Increased H3 mRNA levels coupled with decreased protein abundance led us to  
225 hypothesize that BCAAs may influence turnover of histone H3, such that it may happen more  
226 quickly on low-BCAA diets. In the brain, histone H3 is marked for eviction from chromatin by  
227 acetylation marks and can be replaced by the histone variant H3.3(41, 42). This variant  
228 accumulates with age and is thought to decorate regions of actively transcribed chromatin(43).  
229 We found that it is also transcriptionally increased in the heads of our flies fed low-BCAA diets  
230 (Fig. 3A). To visualize the incorporation and removal of histone H3.3 into neuronal chromatin,  
231 we used an inducible pan-neuronal driver (Nsyb-GeneSwitch-GAL4) to pulse and then chase  
232 fluorescently tagged H3.3 into the brain(41). We observed higher H3.3-GFP signal in fly brains  
233 after one week of feeding on low- vs. high-BCAA diets, indicating an increase in its stability or  
234 persistence in chromatin (Fig. 3B, lower panel; quantified in Fig. 3D), which was not due to  
235 changes in initial H3.3-GFP incorporation (Fig. 3B, top panel; quantified in Fig. 3C) or to  
236 differences in protein degradation more generally (Fig. 3D). These data indicate differential  
237 usage of histone H3 and the variant H3.3A in the fly brain following feeding on a low-BCAA  
238 diet.

239  
240 To determine whether the observed differences in histone acetylation or variant usage were  
241 required for feeding or lifespan differences between the diets, we began with a pharmacological  
242 approach to broadly inhibit histone deacetylases (HDACs), which prevented diet-dependent  
243 differences in histone acetylation (Fig. 2C). Feeding flies the HDAC inhibitor sodium butyrate  
244 for one week abrogated increased feeding on low-BCAA diets, indicating that the histone

245 acetylome could either encode hunger itself or be a permissive response to hunger that modulates  
246 feeding (Fig. 3E). To distinguish between these possibilities, we fed flies HDAC inhibitors for  
247 life and found that this extended the lifespan of flies on high-BCAA food. Dietary modulation of  
248 histone acetylation therefore regulates both feeding and lifespan, supporting the idea that the  
249 histone acetylome encodes hunger rather than feeding *per se* (Fig. 3H). We also tested whether  
250 incorporation of histone variant H3.3 was required for the effects of hunger on feeding and  
251 lifespan by using pan-neuronally expressed RNAi to knock-down the protein chaperone HIRA,  
252 which is required for the exchange of H3 for H3.3(44). We observed that this also abolished  
253 increased feeding on a low-BCAA diet (Fig. 3F), but surprisingly, it had no effect on lifespan  
254 (Fig. 3G). Histone H3/H3.3 swapping is therefore required for modulating feeding in response to  
255 hunger but is dispensable for hunger's effects on lifespan.

256

### 257 **Metabolic intermediates link BCAAs to feeding and lifespan**

258 How might BCAAs from the diet promote modifications to the neuronal epigenome? The  
259 BCAAs are unusual amino acids because, in mammalian systems, they bypass metabolism in the  
260 liver and are instead metabolized in target tissues by the enzymes branched-chain  
261 aminotransferase (BCAT) and branched-chain alpha-ketoacid dehydrogenase (BCKDH)(40, 45,  
262 46). We found that *BCAT* mRNA abundance was reduced in the heads of flies fed low-BCAA  
263 diets (Fig. 4A). Knocking-down *BCAT*, a homolog of mammalian *BCAT2*, with the pan-neuronal  
264 Nsyb-GAL4 driver reduced histone H3 abundance to statistically indistinguishable levels on  
265 low- compared to high-BCAA diets (Fig. 4B). We consulted the Fly Cell Atlas and found that  
266 *BCAT* is expressed in approximately 80 neurons that co-express the promoter used to label R50  
267 hunger neurons, *SerT* (47) (Fig. S5). Strikingly, *BCAT* knock-down only in the R50 hunger

268 neurons also resulted in statistically indistinguishable levels of histone H3 abundance and  
269 reduced H3K9ac on low- compared to high-BCAA diets (Fig. 4C). It also strongly reduced diet-  
270 dependent differences in lifespan by significantly extending the lifespan of flies on high-BCAA  
271 diet (Fig. 4D). This is unlikely to be a result of deficiencies in neuronal activity upon knockdown  
272 of *BCAT* because optogenetic inhibition of the R50 hunger neurons had statistically non-  
273 significant effects on the lifespan of flies fed high-BCAA diets (Fig. S6). These findings indicate  
274 that R50 hunger neurons use BCAA metabolites to modulate aging via a mechanism that does  
275 not require neuronal depolarization. We were surprised, however, to observe that *BCAT*  
276 knockdown in hunger neurons did not abrogate feeding differences and may have in fact  
277 exacerbated them (Fig. 4E). These results suggest complexity in the effector pathways that  
278 increase feeding and modulate aging in response to hunger and reinforce the notion that they are,  
279 at least in part, anatomically distinct.

280

### 281 **Considerations on the divergence of mechanisms linking hunger with feeding and aging**

282 A subset of the R50 hunger neurons produce the neuromodulator serotonin, and we observed that  
283 expression of the genes *Trh*, which encodes tryptophan hydroxylase that functions as the first  
284 and rate-limiting step in serotonin synthesis, and *Tph/Henna*, which encodes tryptophan  
285 phenylalanine hydroxylase, were significantly increased in the heads of flies that were BCAA-  
286 restricted (Fig. 5A). We also observed increased antibody staining of serotonin itself in the cell  
287 bodies of the serotonergic PLP cluster, a subset of the R50 hunger neurons chosen for  
288 quantification due to their easily accessible and recognizable anatomical location in the fly brain  
289 (Fig. 5B-C, quantified in 5D). Given that inhibition of *BCAT* in the R50 neurons seemed to  
290 exacerbate the feeding differences on our BCAA diets and that serotonin is known to both

291 promote and suppress feeding depending on which serotonergic neurons are manipulated(34), we  
292 asked whether *BCAT* knockdown in the serotonergic network more broadly may produce  
293 opposite effects on feeding. We used the *Trh-GAL4* driver, which is putatively expressed in all  
294 serotonergic neurons of the CNS, to target knock-down of *BCAT* and therefore BCAA  
295 metabolism in these cells. This manipulation prevented increased feeding on low-BCAA diets,  
296 suggesting that BCAA metabolites are used within distinct populations of serotonergic neurons  
297 to regulate feeding and aging (Fig. 5E).

298  
299 Intrigued by the possibility that hunger effects on feeding and aging may be regulated by  
300 partially distinct pathways, we questioned if some of this complexity might also result from the  
301 time scale on which they occur. While we consider lifespan to be an outcome of chronic dietary  
302 effects, measurements of feeding quantify more acute responses that may or may not be stable  
303 over longer time periods. We observed that the increased feeding on low-BCAA food that was  
304 present after five days on the diet had receded after two weeks (Fig. 5F), resulting in reduced  
305 amino acid intake overall (Fig. 5G). This result was mirrored by temporal changes in the  
306 epigenome: patterns of changes in brain histone acetylation between diets after two weeks were  
307 reversed or eliminated when compared with similar measures after only five days (Fig. 5H).

308 Thus, flies on low-BCAA diets presumably adapt to their food environment in a way that  
309 decreases the amount of protein they require, which may have beneficial consequences for aging  
310 (see model, Fig. S7).

## 311 **Discussion**

312 Here we present behavioral and molecular evidence in favor of the idea that the neural state of  
313 hunger modulates aging. We show that this motivational state is molecularly encoded by the

314 neuronal epigenome, and that increased feeding and extended lifespan are consequences that  
315 seem to be orchestrated by unique downstream responses to hunger. We found that the  
316 mechanisms that increase feeding and extend lifespan in response to low-BCAAs share the use  
317 of a BCAA-metabolism to histone acetylation pathway but diverge downstream of this  
318 programming. Our findings that dietary BCAAs modulated use of the histone variant H3.3; that  
319 this was required for increasing feeding, but dispensable for increasing lifespan; and that unique  
320 populations of serotonergic neurons require BCAA metabolism to modulate either feeding or  
321 aging, suggest that different neurons use different strategies to generate responses to hunger.  
322 Such complexity is consistent with emerging reports of interactions between metabolism and the  
323 epigenome that are driven in part by specialized enzymes that reside in distinct cellular  
324 compartments and in some cases distinct nuclear sub-compartments(48-50). In *C. elegans*, H3.3  
325 is important for engaging transcriptional networks that underlie neuronal plasticity in response to  
326 environmental manipulations(51, 52). Perhaps neuronal plasticity is one strategy used by circuits  
327 that promote feeding to generate behavioral responses to hunger. Notably, protein appetite was  
328 previously shown to require plastic changes in a dopaminergic circuit, although a role for histone  
329 variant swapping in this process has not been determined(33). Thus, the cell-type specificity of  
330 the usage of histone variant H3.3 and the genomic loci to which it is targeted in response to  
331 dietary BCAAs remain unknown.

332  
333 The observation that BCAA reduction acutely increased appetite but that this eventually subsided  
334 indicates that hunger may act as an allostatic stressor that, like other model homeostatic systems,  
335 acutely increases feeding while chronic hunger may promote physiological changes that lower a  
336 set-point around which appetite is regulated(53, 54). Perhaps it is this adaptative response,

337 mediated by modifications to the epigenome in discrete neural circuits, that slows aging? This  
338 idea is consistent with several dietary manipulations that are known to extend lifespan: low  
339 protein diets (and methionine restriction in particular) generate protein-specific appetites and  
340 intermittent fasting paradigms putatively increase the frequency with which an animal  
341 experiences hunger without affecting total caloric intake(5, 55-59).

342  
343 Others have reported that the effects of BCAAs on feeding and lifespan are non-specific in  
344 *Drosophila* and that such effects can be observed by restriction of other amino acids, which we  
345 did not observe(19). These differences are likely due to experimental design; Juricic et al. used  
346 holidic diets that were comparatively low in their overall amino acid content, which resulted in  
347 reduced activation of TOR signaling. We chose diets that were amino acid replete and had no  
348 effect on TOR activity, which revealed BCAA-specific effects, suggesting that interactions  
349 between total amino acid abundance and reductions of individual amino acids warrant further  
350 investigation.

351  
352 Finally, our data support a role for chromatin reorganization as a link among hunger, feeding,  
353 and aging, but its influence on transcriptional states in individual neurons remains an exciting  
354 area to be explored. In the brain, transcriptional changes occur in response to dietary  
355 manipulations, and yet, analysis of single “longevity genes”, of which the list is continually  
356 growing, is typically insufficient to generalize about how diet modulates aging. This prompts us  
357 to speculate that the effects could require an overhaul of transcriptional programming more  
358 broadly(60-62). Chromatin accessibility patterns, gene expression profiles, and intracellular  
359 signaling pathways converge to determine transcriptional states which, although they are most



360 often studied in the context of neuronal-*fate* determination, may also tune neuronal *states* in  
361 response to dietary or other environmental manipulations(63, 64). Future work that explores how  
362 specific nutrients, and their interactions, interact with each of these processes to shape the  
363 transcriptional environment of distinct neurons presents an important next step towards uniting  
364 seemingly disparate effects of diet on physiology and will likely provide new insight into how  
365 motivational states influence aging.

## 366 **Materials and Methods**

### 367 **Fly stocks and husbandry**

368 Fly stocks were maintained on a standard cornmeal-based larval growth medium and in a  
369 controlled environment (21C, 60% humidity) with a 12:12hr light:dark cycle. We controlled the  
370 developmental larval density by manually aliquoting 32 ul of collected eggs into individual  
371 bottles containing 25-50mL of food at 25C. Following eclosion, mixed sex flies were kept on  
372 SY10% medium (10% w/v sucrose and 10% w/v yeast) for 2-4 days until they were sorted by  
373 sex and transferred onto holidic food or kept on SY10% food, as needed, for experiments.  
374 Experimental flies were flipped to fresh food e/o day until completion of the experiment. Unless  
375 otherwise noted, we used mated female flies that were between 7-12 days old for all  
376 experiments. The following stocks were used for experiments: *Canton-S* and *w<sup>1118</sup>* were obtained  
377 from the Bloomington *Drosophila* Stock Center. *UAS-CsChrimson* (BDSC #55135 and #55136),  
378 *UAS-H3.3A-GFP* (BDSC #68241), *UAS-HIRA RNAi* (BDSC #35346), *GMR50H05-GAL4*  
379 (BDSC #38764), *Trh-GAL4* (BDSC #38388), *UAS-BCAT RNAi* (VDRC KK110229) were  
380 purchased from BDSC or the Vienna *Drosophila* Resource Center, as indicated. *PoxN* mutants  
381 were provided by J. Alcedo (Wayne State University). *Nsyb-GAL4* was provided by L. Buttitta  
382 (University of Michigan, MI) and *Nsyb-GeneSwitch-GAL4* was obtained from A. Sehgal

383 (Perelman School of Medicine, PA). *UAS-GTACR* was provided by M. Dus (University of  
384 Michigan, MI). All transgenic lines used in this study, with the exception of *UAS-H3.3A-GFP*,  
385 *UAS-HIRA RNAi*, *Nsyb-GAL4*, and *Nsyb-GeneSwitch-GAL4* were back-crossed 10 generations to  
386 *w-; Canton-S* prior to experiments.

387

### 388 **Holidic food**

389 Holidic media were prepared according to previous protocols with some modifications<sup>20</sup>. For all  
390 experiments, we used the Yaa ratio of amino acids, but increased each amino acid, sucrose, and  
391 agar (see Extended Data Table 1). Briefly, agar, sucrose, branched-chain amino acids and amino  
392 acids with low solubility (L-Leucine, L-Isoleucine, L-Valine, L-Tyrosine) were added to  
393 solutions containing metal ions and cholesterol. The mixtures were autoclaved for 20 minutes.  
394 Filter-sterilized acetate buffer and solutions of the remaining amino acids, vitamins, nucleotides,  
395 inositol, choline, and preservatives were added while mixtures were stirred on a hot plate not to  
396 exceed 65°C. After mixing, 2mL of food was dispensed into vials and stored at 4°C until use, but  
397 no longer than 3 weeks.

398

### 399 **Drug administration**

400 Sodium Butyrate was purchased from abcam (ab120948) and Trichostatin A was purchased from  
401 Cayman (Item No. 89730). Prior to the lifespan experiment, TSA was dissolved in 100% ethanol  
402 to a concentration of 1 mM, aliquoted, and frozen at -20°C. Food was prepared fresh e/o day as  
403 follows: a TSA aliquot was thawed and sodium butyrate was added as powder to the TSA stock.  
404 Appropriate holidic diet food was melted and allowed to cool slightly, then the inhibitor cocktail  
405 was added (final concentration of TSA was 10  $\mu$ m and sodium butyrate was 10 mm), gently

406 mixed, and dispensed to new vials. For Con-Ex or western blot experiments using only sodium  
407 butyrate, holidic food was melted and sodium butyrate was added as powder to a final  
408 concentration of 100 mM. Roughly 250  $\mu$ l of sodium butyrate-containing food was layered on  
409 top of appropriate holidic food vials and cooled before use.

410

411 For the pulse-chase GeneSwitch experiment, RU486 (mifepristone) was dissolved in 80% (v/v)  
412 ethanol at 10 mM concentration and marked by blue dye (5% [w/v] FD&C Blue No. 1; Spectrum  
413 Chemical) and stored at -20°C. Holidic food + RU486 was prepared by melting appropriate  
414 holidic foods and adding RU486 to a final concentration of 200  $\mu$ M.

415

#### 416 **Lifespan measurements**

417 Lifespans were measured using established protocols<sup>65</sup>. We established 6-10 replicate vials for  
418 each treatment, with 20 flies per vial. Flies were transferred to fresh media every 2-3 days, at  
419 which time dead flies were removed and recorded using the DLife system<sup>65</sup>. Flies were kept in  
420 constant temperature (25C) and humidity (60%) conditions with a 12:12hr light:dark cycle.  
421 Normally, we conducted at least two experimental replicates of each lifespan experiment.

422

#### 423 **Optogenetic Assays**

424 Flies expressing UAS-CsChrimson in desired neuronal populations were reared as described  
425 above. Upon eclosion, females were sorted to SY10% medium containing 800  $\mu$ M all-*trans*-  
426 retinal (from a stock solution of 100mM ATR in 100% ethanol) and kept in the dark for 2 days.  
427 Flies were then flipped to appropriate holidic diet food containing 400  $\mu$ M ATR (and flipped to  
428 fresh ATR-containing food e/o day for the duration of the experiment) and moved to a custom

429 rig containing 627nm (red) LEDs or 530nm (green) LEDs (Luxeon) or kept in the dark in the  
430 same incubator (Fig. S3). The custom rig is fully enclosed to prevent leakage of light and houses  
431 48 individual vials surrounded by mirrors. Custom hardware and firmware were designed to  
432 allow the experimenter to control the LED intensity and a range of other light stimulus  
433 parameters. Lifespan and Con-Ex experiments used a stimulus frequency of 40 Hz and a pulse  
434 width of 800 ms. Flies were exposed to this protocol every day for 12 hours per day during the  
435 light period, followed by 12 hours of darkness.

436

### 437 **Consumption-excretion feeding assays**

438 Con-Ex experiments were carried out as previously described<sup>27,28</sup>. Experimental female flies  
439 were sorted to appropriate BCAA diets (10 flies per vial, 8-10 replicates for each treatment)  
440 when they were >4 days old. Food was changed every 2-3 days until the appropriate  
441 experimental time-point was reached (5 days for standard experiments, unless otherwise  
442 indicated). After the dietary pre-treatment period, blue test food was prepared in removable caps  
443 by adding 1% (w/v) FD&C Blue No. 1 to the appropriate diets. Flies were moved to fresh vials  
444 with the removable blue-food caps on the top of the vials and were allowed to feed and excrete  
445 for 24 hours. Caps and flies were removed after the 24-hour test period and flies were counted.  
446 Excreted dye was collected by vortexing each vial with 3mL of water. Concentration of the dye  
447 was determined by absorbance at 630nm and compared to a standard curve of known  
448 concentrations. For short-term Con-Ex experiments lasting <3 hours, both excretions and flies  
449 were collected and measured. To measure internal blue concentration, groups of flies were  
450 homogenized in 1mL of phosphate-buffered saline containing 0.1% Triton X-100 (IBI  
451 Scientific) for 30s at 30Hz using a QIAGEN TissueLyser. Concentration of internal extracts

452 were determined by absorbance at 630nm and both internal and excreted concentrations were  
453 summed to determine total consumption.

454

#### 455 **Fly Liquid-Food Interaction Counter (FLIC) assays**

456 Flies were tested on the Fly Liquid-Food Interaction Counter (FLIC) system as previously  
457 described<sup>31</sup>(Sable Systems International). Female flies were starved for 20-24 hours in vials  
458 containing a kimwipe with 2mL of Milli-Q water. For single-choice FLIC experiments, flies  
459 were flipped to low-BCAA, high-BCAA, or fresh starvation vials at 10AM the morning of  
460 testing and allowed to feed for 3 hours. Re-feeding food was spiked with blue dye to ensure  
461 feeding, and flies with visually blue bellies were selected for the experiment. FLIC *Drosophila*  
462 Feeding Monitors (DFMs, Sable Systems International, model DFMV3) were loaded with a food  
463 solution containing 5% sucrose and 5% yeast extract (w/v) in 4 mg/l MgCl<sub>2</sub>. After re-feeding,  
464 flies were briefly anesthetized on ice and aspirated into the DFM chambers. We began recording  
465 immediately after loading flies (generally, loading all DFMs requires <10 minutes) and measured  
466 FLIC interactions for 3 hours. For FLIC experiments that contained a choice environment in the  
467 common garden, re-feeding food was prepared fresh for each experiment by melting SY10%  
468 medium with or without 1% L-Isoleucine (w/v). FLIC DFMs were loaded with food solutions  
469 containing either 2% sucrose OR [2% yeast extract + 1% sucrose] in 4 mg/l MgCl<sub>2</sub> and FLIC  
470 interactions were recorded for 24 hours. Each DFM was loaded with flies from at least two  
471 treatment groups to reduce technical bias from individual DFM signals. FLIC data were analyzed  
472 using custom R code, which is available at [https://github.com/PletcherLab/FLIC\\_R\\_Code](https://github.com/PletcherLab/FLIC_R_Code).  
473 Default thresholds were used for analysis except for the following: minimum feeding threshold =  
474 10, tasting threshold = (0,10). Animals that did not participate (i.e. returned zero values) were

475 excluded from analysis. FLIC data are generally non-normal, and thus are expressed as a box-  
476 cox transformation to the 0.25 power of the total interactions, which yielded normal  
477 distributions.

478

## 479 **Western Blots**

480 Experimental flies were flash frozen in liquid nitrogen after appropriate diet or light exposures.  
481 Heads and bodies were separated using a metal sieve on dry ice, and 10 heads were pooled for  
482 each biological replicate. Heads were first pulverized to a fine powder using a plastic pestle on  
483 dry ice. Protein extraction was carried out on ice using RIPA buffer (Sigma Aldrich)  
484 supplemented with protease inhibitor cocktail (Sigma), phosphatase inhibitor cocktail (Sigma),  
485 sodium orthovanadate (NEB, 1mM), sodium fluoride (NEB, 1 mM), and sodium butyrate  
486 (100uM). 150uL of ice cold buffer was added to heads followed by immediate homogenization  
487 with a motorized pestle for 10 seconds on ice. Lysates were incubated on ice for 10 minutes  
488 followed by 20 seconds of sonication and centrifugation at 16000xg at 4C for 10 minutes.  
489 Protein lysates were added 1:1 to 2X protein sample buffer (1mM Tris-HCL pH 6.8, 10% SDS,  
490 1% Bromophenol blue, and 1M DTT) and denatured at 95°C for 10 minutes. Protein was  
491 separated by SDS-PAGE on a 4-12% gel (Biorad) at 200V for 30 minutes, followed by  
492 electrophoretic transfer to PVDF or nitrocellulose membrane at 70V for 1 hour. Blots were  
493 incubated in 5% milk in .1% TBS-T at room temperature for one hour, followed by overnight  
494 incubation with primary antibodies overnight at 4°C. Membranes were washed with .1% TBS-T  
495 and incubated with HRP-conjugated secondary antibodies (abcam) at room temperature for 1-4  
496 hours. Membranes were washed again with .1% TBS-T and then incubated briefly in ECL  
497 substrate (SuperSignal West Femto, ThermoFisher) before imaging. Band detection and

498 quantification was performed using Image Lab software (Bio-Rad). Rabbit anti-histone H3  
499 (abcam, ab1791, 1:20000), Rat anti-histone H3K9ac (active motif, #61663, 1:500), Rabbit anti-  
500 LaminB1(CST, #13435S, 1:2000) Rabbit anti-Beta-Tubulin (abcam, ab179513, 1:500), rabbit  
501 anti-pS6K(T398) (#9209S 082813, 1:1000), mouse anti-H4K9me3 (Millipore #05-1242,  
502 1:1000), rabbit anti-H3K27ac (D. Lombard, 1:2000), rabbit anti-ubiquitin (Santa Cruz 1:5000),  
503 Rabbit anti-histone H4 (abcam, ab10158 1:5000), mouse anti-GAPDH (proteintech #60004  
504 1:1000), rabbit anti-dS6K (T. Neufeld 1:3500), rabbit anti-pAKT (CST 1:1000), rabbit anti-AKT  
505 (CST 1:1000), and rabbit anti-GFP (abcam, 1:1000) were used for primary antibody staining.

506

### 507 **RNA extraction and RT-qPCR**

508 Experimental flies were flash frozen in liquid nitrogen after appropriate diet exposures. Heads  
509 and bodies were separated using a metal sieve on dry ice, and 10 heads were pooled for each  
510 biological replicate. Total RNA was extracted using TRIzol Reagent (Thermo Fisher Scientific,  
511 #15596026) following the manufacturer's instructions. Flies were collected into nuclease-free  
512 lysing tubes with matrix D beads (MPbio, #6913-500-129984) and 300 ul of TRIzol, then  
513 homogenized for two 15-s pulses at 6.5 M/s. Lysates were incubated at room temperature for 10  
514 min, and then 100 ul of chloroform (Sigma-Aldrich) was added for phase separation. 175 ul of  
515 RNA containing supernatant was transferred to nuclease-free tubes and mixed with an equal  
516 volume of isopropanol (Sigma-Aldrich) to precipitate the RNA, and centrifuged at 12000xg for  
517 15 min at 4°C. The pellet was washed twice with 70% cold EtOH (Sigma-Aldrich), air dried, and  
518 redissolved in 25 ul of nuclease-free water. RNA concentration and quality was determined using  
519 a NanoDrop One (Thermo Fisher Scientific). Complementary DNA (cDNA) was prepared from  
520 1 ug of total RNA using High-Capacity cDNA Reverse Transcription Kit (Thermo Fisher

521 Scientific) and the resulting cDNA was diluted 1:50 before use. No-RT reactions were prepared  
522 and run as controls to ensure no genomic DNA contamination. Quantitative polymerase chain  
523 reactions (qPCRs) contained 1X PowerUp SYBR Green PCR Master Mix (Applied Biosystems),  
524 500 nM appropriate primers, and 5 ul 1:50 cDNA for a total reaction volume of 10 ul. C<sub>T</sub> values  
525 were calculated using an absolute threshold of  $\Delta R_n=0.1$  and relative expression was determined  
526 using the comparative C<sub>T</sub> approach<sup>66</sup>. Primers used in this study are:

527 *RpL-32-RA*\_Forward (cgg atc gat atg cta agc tgt) and

528 *RpL-32-RA*\_Reverse (gcc ctt gtt cga tcc gta)

529 *H3.3A*\_Forward (GAAGAAGCCACATCGCTACC) and

530 *H3.3A*\_Reverse (CACAGATTGGTGTCTCGAA)

531 *H3*\_Forward (ACCGAGCTTCTAATCCGCAAG) and

532 *H3*\_Reverse (ACCAACCAGGTAGGCTTCGC)

533 *CGI673*\_Forward (TGCGCTTTTACTTCCAAGCAGCA) and

534 *CGI673*\_Reverse (GGGCCTAGGTTCTACTGACGGGT)

535 *Trh*\_Forward (GTGCTCCAGTTTTGACTTCGG) and

536 *Trh*\_Reverse (TTTACGGTACACGGGGTCCT)

537 *Tph*\_Forward (CCTCTGTACTATGTGGCCGA) and

538 *Tph*\_Reverse (TCGAGTCGAGAACCTCAACA)

539

#### 540 **Brain Immunohistochemistry**

541 Adult brain immunostaining was performed as previously described<sup>67</sup>. Adult brains were

542 dissected and fixed in PBS, pH 7.4 containing 3.7% formaldehyde for approximately 1 hr. Fixed

543 brains were washed quickly 3 times followed by 3 – 20 min washes in 0.1% PBS-T, or 0.5%



544 PBS-T for histone immunostaining, with gentle shaking at room temperature. Brains were  
545 blocked using 5% normal goat serum (NGS) in 0.1% PBS-T for at least 30 min at room  
546 temperature with gentle rocking, then incubated in primary antibody diluted in 5% NGS for two  
547 nights at 4°C. After primary antibody incubation, brains were washed 3 times in PBS-T and  
548 incubated in secondary antibody diluted 1:500 in 5% NGS for one night at 4°C. Brains were  
549 washed 3 times in PBS-T and mounted between a glass microscope slide and a #1.5 cover glass  
550 separated by a custom bridge in VECTASHIELD Antifade Mounting Medium (Vector  
551 Laboratories). Samples were imaged on a Nikon A1 Confocal Microscope using either a 20X air  
552 or 40X oil lens objective. All treatments were mounted under the same cover slip and at least two  
553 slides per experiment were imaged. Image processing was performed using ImageJ (NIH). ROIs  
554 were drawn by hand around appropriate cell bodies and values are background-subtracted.  
555 Images are representative maximum intensity projections compiled from 1-2  $\mu\text{m}$  thick sections  
556 of the indicated number of z-stacks and are contrast matched. Rabbit anti-serotonin (Sigma,  
557 S5545 1:6000), mouse anti-nc82 (DSHB 1:20) and rabbit anti-histone H3 (abcam, ab1791  
558 1:20000) were used for primary antibody staining, and Alexa Fluor 488 and 594 were used for  
559 secondary antibody staining (Life Technologies 1:1000).

560

### 561 **Egg laying assay**

562 Following eclosion, male and female flies were allowed to mate on SY10% food for 48 hours.  
563 Groups of 5 males and 5 females were sorted to appropriate holidic diets. Food was changed  
564 every day for the first 2 days and e/o day thereafter and eggs were counted from the old media.  
565 Egg counts were obtained from 8-10 vials per treatment.

566

### 567 **Triacylglyceride and Total Protein Quantification**

568 Experimental flies were flash frozen in liquid nitrogen after exposure to appropriate diets for one  
569 week. Two experimental flies per biological replicate were homogenized in 200  $\mu$ l PBS/0.05%  
570 Triton-X with protease inhibitor cocktail (Sigma). The homogenate was added into Infinity  
571 Triglyceride Reagent (Thermo Electron Corp.) according to manufacturer's instructions. In  
572 parallel, the homogenate was added to BCA working reagent (Pierce BCA Protein Assay Kit)  
573 according to manufacturer's instructions. TAG concentrations were determined by the  
574 absorbance at 520nm and estimated by a known triglyceride standard. Total protein  
575 concentrations were determined by absorbance at 562 nm and estimated by a known protein  
576 albumin standard.

577

### 578 **Activity Assay**

579 Activity recordings and data processing were performed using the *Drosophila* Activity Monitor  
580 System (TriKinetics). After diet exposure for 5 days, adult flies were individually tested in 5 mm  
581 x 65 mm polycarbonate tubes with the appropriate diet food at one end of the testing tube. The  
582 first day of data was removed from the final analysis in order to allow for acclimation to  
583 experimental housing conditions. Total activity counts were calculated for each fly by summing  
584 all activity counts recorded during the light and dark cycle, respectively. Experiments were  
585 performed at 25°C and 60% humidity under a 12-hour light:12-hour dark cycle.

586

587

588

## 589 **Statistics**

590 Pairwise comparisons between treatment survivorship curves were carried out using the  
591 statistical package R with DLife, as previously described<sup>65</sup>. P-values were obtained using the  
592 log-rank test. For all other comparisons involving only one level, we used Student's t-test to  
593 detect significant differences between two treatments or one-way ANOVA followed by Tukey's  
594 post-hoc test after verifying normality and equality of variances. T-tests were two-tailed during  
595 initial characterization experiments, or one-tailed in future experiments where the predicted  
596 direction of change was known. For comparisons involving more than one level, we used two-  
597 way ANOVA to detect significant interactions between the levels and followed up with Tukey's  
598 post-hoc when significance was detected ( $p < 0.05$ ). In cases where data were non-normally  
599 distributed (FLIC data), we performed a box-cox transformation to the 0.25 power before  
600 computing P-values. In cases where experimental replicates were pooled, a two-way ANOVA  
601 with blocking for experiment was performed to ensure non-significant experimental effects. P-  
602 values for experiments with less than 3 biological replicates per treatment are not reported. For  
603 all dot and bar plots, error bars represent the SEM. All statistical tests and graphing were  
604 performed using R. Specific details of statistical analyses are presented in the figure legends.

605

## 606 **References**

- 607 1. L. Fontana, L. Partridge, Promoting health and longevity through diet: from model  
608 organisms to humans. *Cell* **161**, 106-118 (2015).
- 609 2. W. Mair, M. D. Piper, L. Partridge, Calories do not explain extension of life span by  
610 dietary restriction in *Drosophila*. *PLoS biology* **3**, e223 (2005).
- 611 3. D. A. Skorupa, A. Dervisefendic, J. Zwiener, S. D. Pletcher, Dietary composition  
612 specifies consumption, obesity, and lifespan in *Drosophila melanogaster*. *Aging cell* **7**,  
613 478-490 (2008).
- 614 4. S. M. Solon-Biet *et al.*, The ratio of macronutrients, not caloric intake, dictates  
615 cardiometabolic health, aging, and longevity in ad libitum-fed mice. *Cell metabolism* **19**,  
616 418-430 (2014).

- 617 5. S. J. Simpson *et al.*, Dietary protein, aging and nutritional geometry. *Ageing research*  
618 *reviews* **39**, 78-86 (2017).
- 619 6. M. L. Andermann, B. B. Lowell, Toward a Wiring Diagram Understanding of Appetite  
620 Control. *Neuron* **95**, 757-778 (2017).
- 621 7. J. Berrios *et al.*, Food cue regulation of AGRP hunger neurons guides learning. *Nature*  
622 **595**, 695-700 (2021).
- 623 8. J. Apfeld, C. Kenyon, Regulation of lifespan by sensory perception in *Caenorhabditis*  
624 *elegans*. *Nature* **402**, 804-809 (1999).
- 625 9. M. J. Waterson *et al.*, Water sensor ppk28 modulates *Drosophila* lifespan and  
626 physiology through AKH signaling. *Proceedings of the National Academy of Sciences of*  
627 *the United States of America* **111**, 8137-8142 (2014).
- 628 10. I. Ostojic *et al.*, Positive and negative gustatory inputs affect *Drosophila* lifespan partly in  
629 parallel to dFOXO signaling. *Proceedings of the National Academy of Sciences of the*  
630 *United States of America* **111**, 8143-8148 (2014).
- 631 11. S. Libert *et al.*, Regulation of *Drosophila* life span by olfaction and food-derived odors.  
632 *Science* **315**, 1133-1137 (2007).
- 633 12. M. A. Vargas, N. Luo, A. Yamaguchi, P. Kapahi, A role for S6 kinase and serotonin in  
634 postmating dietary switch and balance of nutrients in *D. melanogaster*. *Curr Biol* **20**,  
635 1006-1011 (2010).
- 636 13. C. Ribeiro, B. J. Dickson, Sex peptide receptor and neuronal TOR/S6K signaling  
637 modulate nutrient balancing in *Drosophila*. *Curr Biol* **20**, 1000-1005 (2010).
- 638 14. A. M. Felton *et al.*, Protein content of diets dictates the daily energy intake of a free-  
639 ranging primate. *Behav. Ecol.* **20**, 685-690 (2009).
- 640 15. E. D. Smith *et al.*, Age- and calorie-independent life span extension from dietary  
641 restriction by bacterial deprivation in *Caenorhabditis elegans*. *BMC Dev Biol* **8**, 49  
642 (2008).
- 643 16. B. Zhang, H. Jun, J. Wu, J. Liu, X. Z. S. Xu, Olfactory perception of food abundance  
644 regulates dietary restriction-mediated longevity via a brain-to-gut signal. *Nat Aging* **1**,  
645 255-268 (2021).
- 646 17. J. Ro *et al.*, Serotonin signaling mediates protein valuation and aging. *Elife* **5**, (2016).
- 647 18. S. M. Solon-Biet *et al.*, Branched chain amino acids impact health and lifespan indirectly  
648 via amino acid balance and appetite control. *Nat Metab* **1**, 532-545 (2019).
- 649 19. P. Juricic, S. Gronke, L. Partridge, Branched-Chain Amino Acids Have Equivalent  
650 Effects to Other Essential Amino Acids on Lifespan and Aging-Related Traits in  
651 *Drosophila*. *J Gerontol A Biol Sci Med Sci* **75**, 24-31 (2020).
- 652 20. M. D. Piper *et al.*, A holidic medium for *Drosophila melanogaster*. *Nat Methods* **11**, 100-  
653 105 (2014).
- 654 21. S. C. Johnson, P. S. Rabinovitch, M. Kaerberlein, mTOR is a key modulator of ageing  
655 and age-related disease. *Nature* **493**, 338-345 (2013).
- 656 22. S. Hao *et al.*, Uncharged tRNA and sensing of amino acid deficiency in mammalian  
657 piriform cortex. *Science* **307**, 1776-1778 (2005).
- 658 23. M. Bjordal, N. Arquier, J. Kniazeff, J. P. Pin, P. Leopold, Sensing of amino acids in a  
659 dopaminergic circuitry promotes rejection of an incomplete diet in *Drosophila*. *Cell* **156**,  
660 510-521 (2014).
- 661 24. N. E. Richardson *et al.*, Lifelong restriction of dietary branched-chain amino acids has  
662 sex-specific benefits for frailty and lifespan in mice. *Nat Aging* **1**, 73-86 (2021).
- 663 25. J. M. C. McDonald, P. Nabili, L. Thorsen, S. Jeon, A. W. Shingleton, Sex-specific  
664 plasticity and the nutritional geometry of insulin-signaling gene expression in *Drosophila*  
665 *melanogaster*. *Evodevo* **12**, 6 (2021).
- 666 26. M. F. Camus, M. D. Piper, M. Reuter, Sex-specific transcriptomic responses to changes  
667 in the nutritional environment. *Elife* **8**, (2019).

- 668 27. B. C. Shell *et al.*, Measurement of solid food intake in *Drosophila* via consumption-  
669 excretion of a dye tracer. *Sci Rep* **8**, 11536 (2018).
- 670 28. B. C. Shell, Y. Luo, S. Pletcher, M. Grotewiel, Expansion and application of dye tracers  
671 for measuring solid food intake and food preference in *Drosophila*. *Sci Rep* **11**, 20044  
672 (2021).
- 673 29. K. P. Lee *et al.*, Lifespan and reproduction in *Drosophila*: New insights from nutritional  
674 geometry. *Proceedings of the National Academy of Sciences of the United States of*  
675 *America* **105**, 2498-2503 (2008).
- 676 30. K. Steck *et al.*, Internal amino acid state modulates yeast taste neurons to support  
677 protein homeostasis in *Drosophila*. *Elife* **7**, (2018).
- 678 31. J. Ro, Z. M. Harvanek, S. D. Pletcher, FLIC: high-throughput, continuous analysis of  
679 feeding behaviors in *Drosophila*. *PLoS one* **9**, e101107 (2014).
- 680 32. Y. Lyu *et al.*, *Drosophila* serotonin 2A receptor signaling coordinates central metabolic  
681 processes to modulate aging in response to nutrient choice. *Elife* **10**, (2021).
- 682 33. Q. Liu *et al.*, Branch-specific plasticity of a bifunctional dopamine circuit encodes protein  
683 hunger. *Science* **356**, 534-539 (2017).
- 684 34. S. D. Albin *et al.*, A Subset of Serotonergic Neurons Evokes Hunger in Adult *Drosophila*.  
685 *Curr Biol* **25**, 2435-2440 (2015).
- 686 35. P. Mews *et al.*, Acetyl-CoA synthetase regulates histone acetylation and hippocampal  
687 memory. *Nature* **546**, 381-386 (2017).
- 688 36. K. E. Wellen *et al.*, ATP-citrate lyase links cellular metabolism to histone acetylation.  
689 *Science* **324**, 1076-1080 (2009).
- 690 37. C. Lopez-Otin, M. A. Blasco, L. Partridge, M. Serrano, G. Kroemer, The hallmarks of  
691 aging. *Cell* **153**, 1194-1217 (2013).
- 692 38. M. Herre, E. Korb, The chromatin landscape of neuronal plasticity. *Curr Opin Neurobiol*  
693 **59**, 79-86 (2019).
- 694 39. M. A. Reid, Z. Dai, J. W. Locasale, The impact of cellular metabolism on chromatin  
695 dynamics and epigenetics. *Nat Cell Biol* **19**, 1298-1306 (2017).
- 696 40. J. T. Brosnan, M. E. Brosnan, Branched-chain amino acids: enzyme and substrate  
697 regulation. *J Nutr* **136**, 207S-211S (2006).
- 698 41. K. Ahmad, S. Henikoff, The histone variant H3.3 marks active chromatin by replication-  
699 independent nucleosome assembly. *Mol Cell* **9**, 1191-1200 (2002).
- 700 42. A. Sakai, B. E. Schwartz, S. Goldstein, K. Ahmad, Transcriptional and developmental  
701 functions of the H3.3 histone variant in *Drosophila*. *Curr Biol* **19**, 1816-1820 (2009).
- 702 43. A. Tvardovskiy, V. Schwammle, S. J. Kempf, A. Rogowska-Wrzesinska, O. N. Jensen,  
703 Accumulation of histone variant H3.3 with age is associated with profound changes in  
704 the histone methylation landscape. *Nucleic Acids Res* **45**, 9272-9289 (2017).
- 705 44. B. Loppin *et al.*, The histone H3.3 chaperone HIRA is essential for chromatin assembly  
706 in the male pronucleus. *Nature* **437**, 1386-1390 (2005).
- 707 45. D. Biswas, L. Duffley, T. Pulinilkunnil, Role of branched-chain amino acid-catabolizing  
708 enzymes in intertissue signaling, metabolic remodeling, and energy homeostasis.  
709 *FASEB J* **33**, 8711-8731 (2019).
- 710 46. M. D. Neinast *et al.*, Quantitative Analysis of the Whole-Body Metabolic Fate of  
711 Branched-Chain Amino Acids. *Cell metabolism* **29**, 417-429 e414 (2019).
- 712 47. H. Li *et al.*, Fly Cell Atlas: A single-nucleus transcriptomic atlas of the adult fruit fly.  
713 *Science* **375**, eabk2432 (2022).
- 714 48. S. Sivanand, I. Viney, K. E. Wellen, Spatiotemporal Control of Acetyl-CoA Metabolism in  
715 Chromatin Regulation. *Trends Biochem Sci* **43**, 61-74 (2018).
- 716 49. R. Boon, G. G. Silveira, R. Mostoslavsky, Nuclear metabolism and the regulation of the  
717 epigenome. *Nat Metab* **2**, 1190-1203 (2020).

- 718 50. K. W. Ryu *et al.*, Metabolic regulation of transcription through compartmentalized  
719 NAD(+) biosynthesis. *Science* **360**, (2018).
- 720 51. I. Maze *et al.*, Critical Role of Histone Turnover in Neuronal Transcription and Plasticity.  
721 *Neuron* **87**, 77-94 (2015).
- 722 52. A. Piazzesi *et al.*, Replication-Independent Histone Variant H3.3 Controls Animal  
723 Lifespan through the Regulation of Pro-longevity Transcriptional Programs. *Cell Rep* **17**,  
724 987-996 (2016).
- 725 53. B. S. McEwen, Stress, adaptation, and disease. Allostasis and allostatic load. *Ann N Y*  
726 *Acad Sci* **840**, 33-44 (1998).
- 727 54. K. C. Berridge, Motivation concepts in behavioral neuroscience. *Physiol Behav* **81**, 179-  
728 209 (2004).
- 729 55. R. Leitao-Goncalves *et al.*, Commensal bacteria and essential amino acids control food  
730 choice behavior and reproduction. *PLoS biology* **15**, e2000862 (2017).
- 731 56. B. C. Lee *et al.*, Methionine restriction extends lifespan of *Drosophila melanogaster*  
732 under conditions of low amino-acid status. *Nat Commun* **5**, 3592 (2014).
- 733 57. N. Orentreich, J. R. Matias, A. DeFelice, J. A. Zimmerman, Low methionine ingestion by  
734 rats extends life span. *J Nutr* **123**, 269-274 (1993).
- 735 58. A. Di Francesco, C. Di Germanio, M. Bernier, R. de Cabo, A time to fast. *Science* **362**,  
736 770-775 (2018).
- 737 59. J. H. Catterson *et al.*, Short-Term, Intermittent Fasting Induces Long-Lasting Gut Health  
738 and TOR-Independent Lifespan Extension. *Curr Biol* **28**, 1714-1724 e1714 (2018).
- 739 60. M. D. Piper, A. Bartke, Diet and aging. *Cell metabolism* **8**, 99-104 (2008).
- 740 61. D. Wilinski *et al.*, Rapid metabolic shifts occur during the transition between hunger and  
741 satiety in *Drosophila melanogaster*. *Nat Commun* **10**, 4052 (2019).
- 742 62. A. Vaziri *et al.*, Persistent epigenetic reprogramming of sweet taste by diet. *Sci Adv* **6**,  
743 (2020).
- 744 63. J. Janssens *et al.*, Decoding gene regulation in the fly brain. *Nature* **601**, 630-636  
745 (2022).
- 746 64. T. Tsukahara *et al.*, A transcriptional rheostat couples past activity to future sensory  
747 responses. *Cell* **184**, 6326-6343 e6332 (2021).
- 748 65. N. J. Linford, C. Bilgir, J. Ro, S. D. Pletcher, Measurement of lifespan in *Drosophila*  
749 *melanogaster*. *Journal of visualized experiments : JoVE*, (2013).
- 750 66. T. D. Schmittgen, K. J. Livak, Analyzing real-time PCR data by the comparative C(T)  
751 method. *Nat Protoc* **3**, 1101-1108 (2008).
- 752 67. J. S. Wu, L. Luo, A protocol for dissecting *Drosophila melanogaster* brains for live  
753 imaging or immunostaining. *Nat Protoc* **1**, 2110-2115 (2006).
- 754

755 **Acknowledgments:** We wish to thank past and present members of the Pletcher laboratory for  
756 their support and comments about the experimental design of these studies, and express gratitude  
757 to David Paris for his help engineering and creating some tools used in this study. We also thank  
758 members of the Lombard laboratory for sharing antibodies and protocols. We acknowledge  
759 Binyamin Jacobovitz in the Michigan Medicine Microscopy Core for training and advice on  
760 confocal imaging. **Funding:** This research was supported by The National Science Foundation

761 Graduate Research Fellowship Program (No. DGE 1256260) and the Howard Hughes Medical  
762 Institute through the James H. Gilliam Fellowships for Advanced Study program to K.J.W  
763 (#GT11426) and the US National Institute of Health, National Institute on Aging (R01  
764 AG051649, R01 AG030593, and R01 AG063371) and the Glenn Medical Foundation to S.D.P.

765 **Author contributions:**

766 Conceptualization: KJW, SDP

767 Methodology: KJW, SDP

768 Investigation: KJW, RAH, EH, SDP

769 Visualization: KJW, EH

770 Funding acquisition: KJW, SDP

771 Project administration: KJW, SDP

772 Supervision: KJW, SDP

773 Writing – original draft: KJW, SDP

774 Writing – review & editing: KJW, SDP

775

776 **Competing interests:** The senior author (S.D.P) is a share holder in the company, Flidea, which  
777 has developed technology related to the FLIC feeding system. **Data and materials availability:**

778 The datasets generated during the current study are available from the corresponding author on  
779 reasonable request.nFLIC data were analyzed using custom R code, which is available at

780 [https://github.com/PletcherLab/FLIC\\_R\\_Code](https://github.com/PletcherLab/FLIC_R_Code).

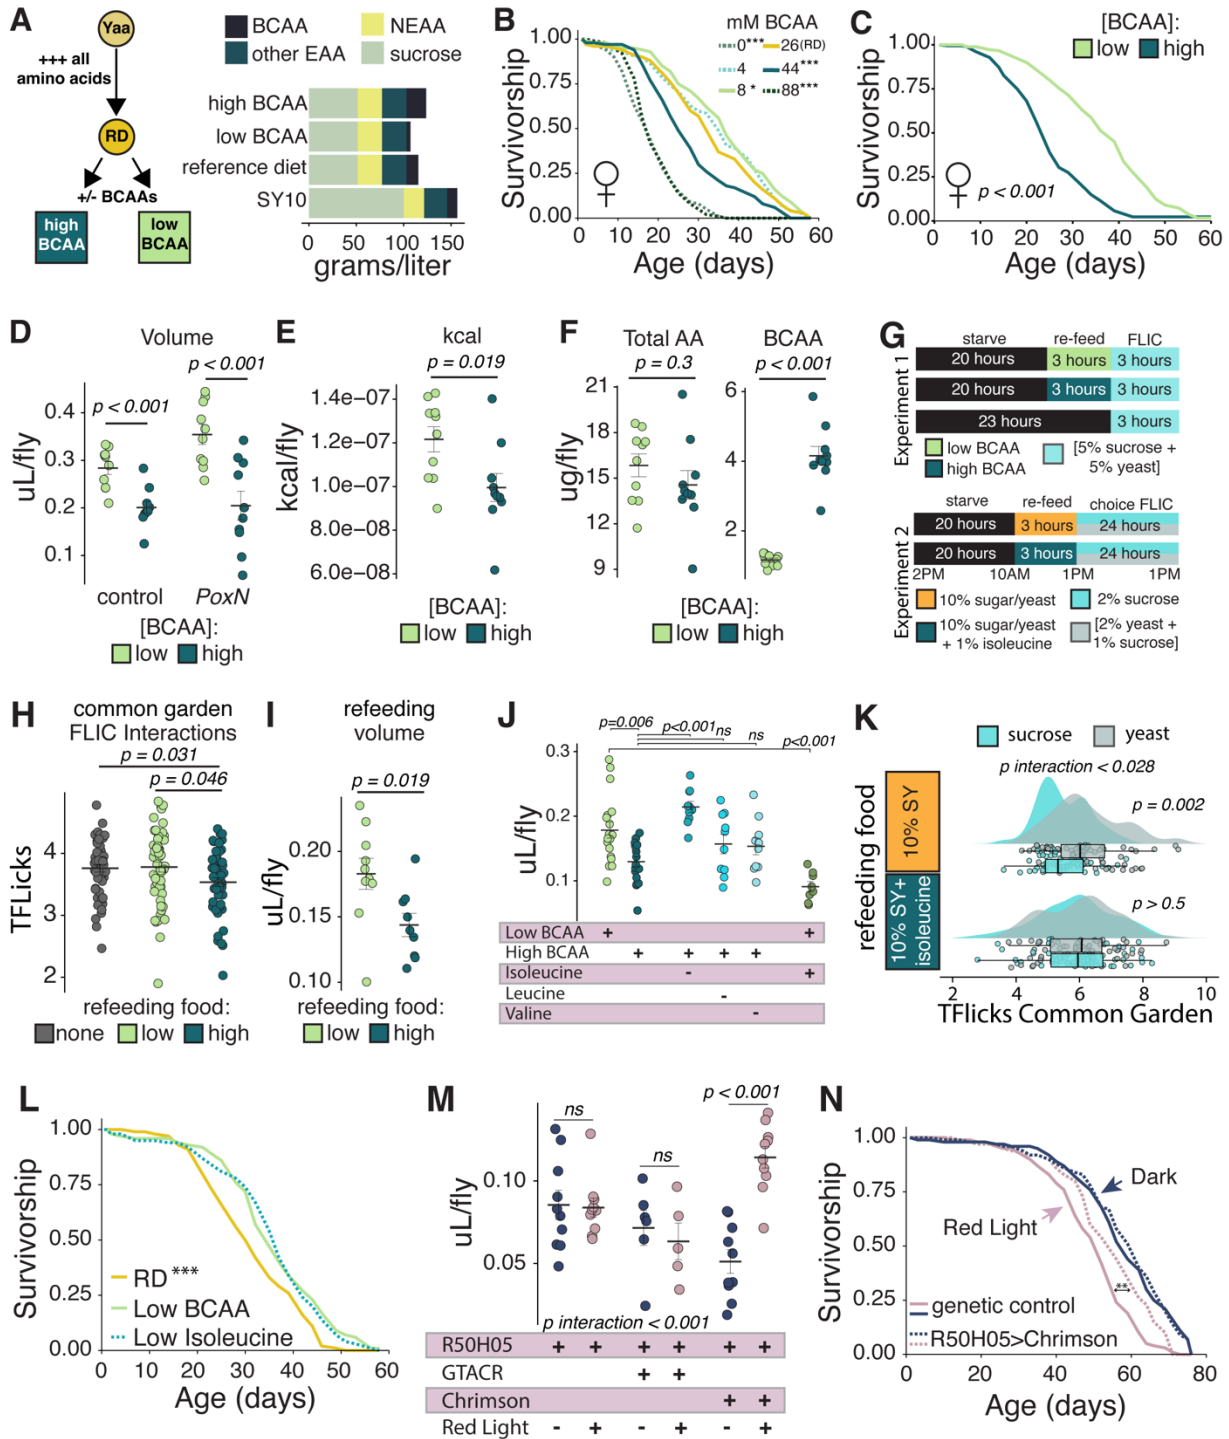

Figure 1

781

782



783 **Figure 1. Hunger extends lifespan independent of appetite in dietary and genetic models of**  
784 **hungry flies. (A)** Schematic (left) and relative composition (right) of experimental diets. Details  
785 in Supplementary Tables S1-2 and Methods. Yaa=baseline diet as in (20), RD=reference diet,  
786 containing 51.36g/L carbohydrate, 34.9g/L non-essential amino acids, 22.56g/L non-BCAA  
787 essential amino acids and, 12.39g/L BCAAs. **(B)** Lifespan of *Canton-S* flies on diets of indicated  
788 BCAA concentration (log-rank test, p-values derived by comparison to RD, N=159-172). **(C)**  
789 Lifespan of *Canton-S* flies on low- or high-BCAA diets (log-rank test, N=173-175). **(D-F)** 24-hr  
790 Con-Ex measurement of *w<sup>1118</sup>* or *PoxN* flies on indicated diets. Volume (D), kcal (E), and total or  
791 BCAA-only amino acid intake (F) (two-tailed Student's t-test). **(G)** Schematic of FLIC  
792 experimental designs used in H-I (top panel) and K (bottom panel). **(H)** FLIC interactions in  
793 common garden (one-way ANOVA with Tukey's post-hoc. Experimental replicates are pooled,  
794 N=52-55). **(I)** Con-Ex measurement of volumetric intake during re-feeding period (two-tailed  
795 Student's t-test). **(J)** Con-Ex measurement on diets with individual BCAA reductions (one-way  
796 ANOVA with Tukey's post-hoc). **(K)** FLIC interactions in food choice environment (2% sucrose  
797 or [2% yeast + 1% sucrose]) after re-feeding SY food +/- 1% isoleucine (two-way ANOVA with  
798 Tukey's post-hoc. Experimental replicates are pooled, N=59-60). **(L)** Lifespan of *Canton-S* flies  
799 on RD, low-BCAA, or low-isoleucine diets (log-rank test, p-values derived by comparison to  
800 low-BCAA diet, N=171-177). **(M-N)** Con-Ex and lifespan measurements of flies carrying  
801 R50H05-GAL>UAS-CsChrimson or R50H05-GAL4/w-;CS controls exposed to red light for 12  
802 hours per day or kept in constant darkness. (M) 24-hr Con-Ex measurement (two-way ANOVA  
803 with Tukey's post-poc). (N) Lifespan measurement (log-rank test, N=101-123). All FLIC data  
804 are expressed as box-cox transformation to the 0.25 power (termed TFLicks) to achieve  
805 normality. \*p<0.05, \*\*p<0.01, \*\*\*p<0.001.

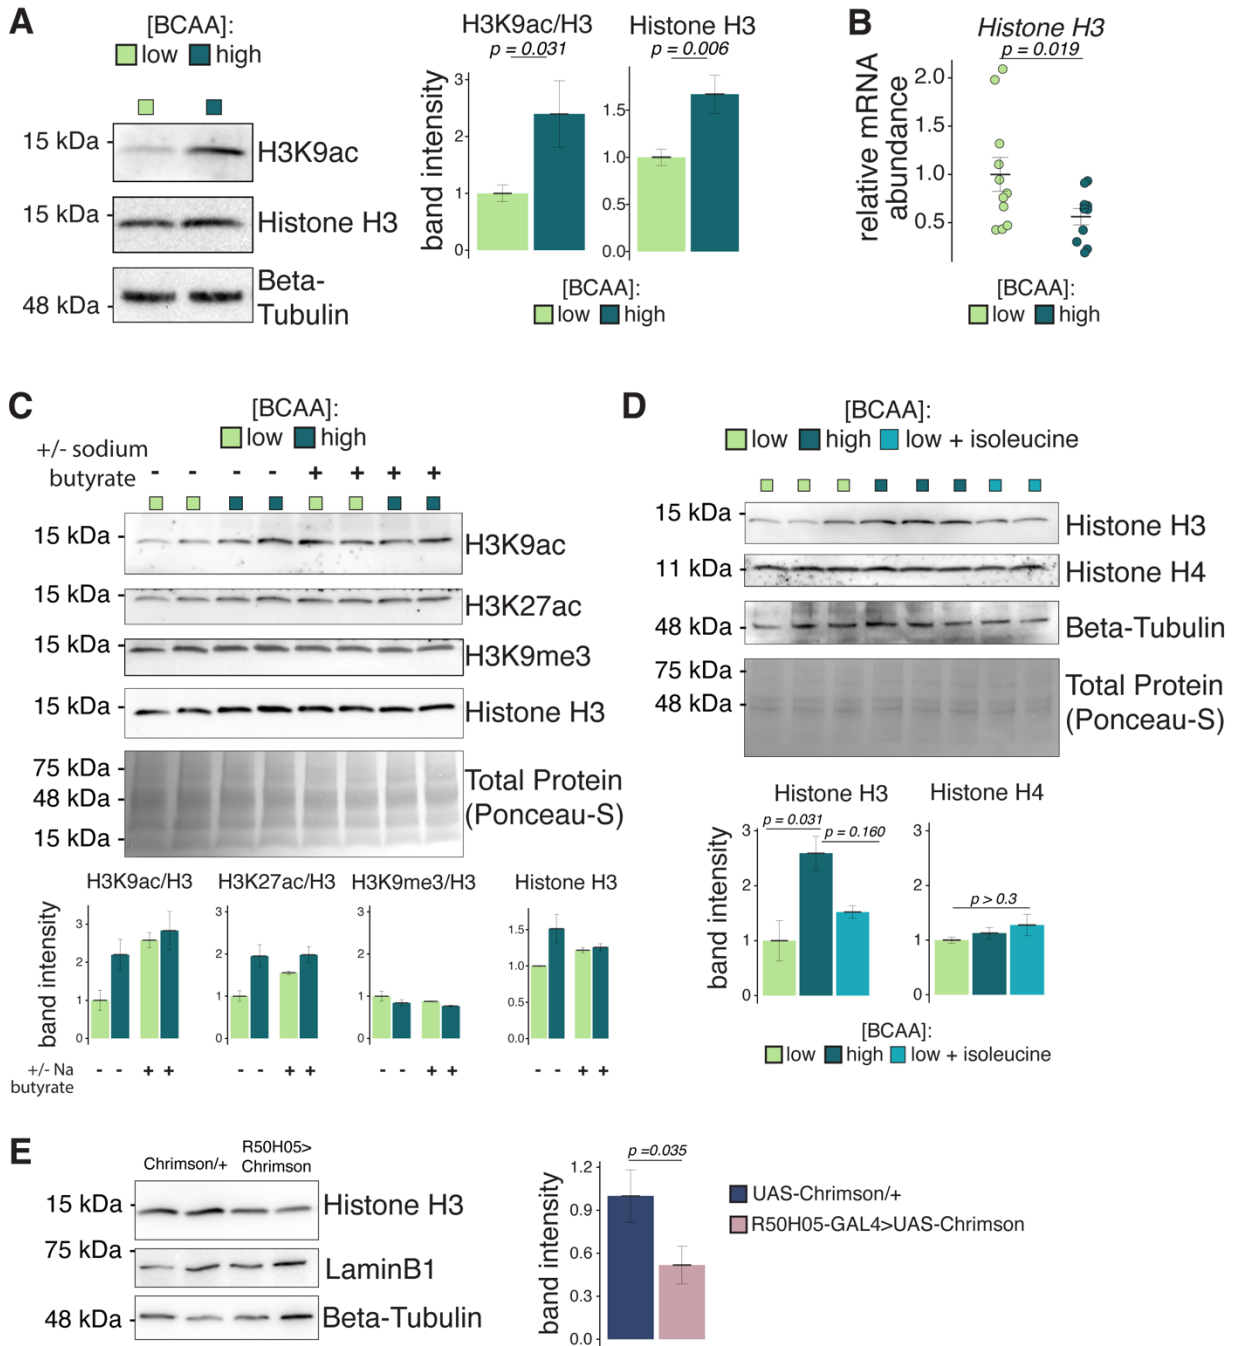

Figure 2

807 **Figure 2. Dietary BCAAs reshape the neuronal epigenome by altering histone acetylation**  
808 **and histone H3 abundance.** (A) Representative western blot for H3K9ac and total histone H3 in  
809 *Canton-S* fly heads after exposure to indicated diets for 5-7 days, quantified in right panel (one-  
810 way ANOVA. 10 heads per biological replicate, experimental replicates are pooled, N=11). (B)  
811 RT-qPCR measurement of relative mRNA abundance in *Canton-S* heads after 5-7 days on low-  
812 or high-BCAA, values are normalized to low-BCAA treatment (one-way ANOVA. 10 heads per  
813 biological replicate, experimental replicates are pooled, N=10-11). (C) Western blot for histone  
814 PTMs in *Canton-S* fly heads after exposure to indicated diets +/- 100 mM sodium butyrate for 5-  
815 7 days, bands are quantified in bottom panel and normalized to low-BCAA treatment (10 heads  
816 per biological replicate, N=2). (D) Western blot for histone H3 and H4 in *Canton-S* heads on  
817 low-BCAA, high-BCAA, or [low-BCAA + high isoleucine] diets, quantified in bottom panel and  
818 normalized to low-BCAA treatment (one-way ANOVA with Tukey's post-hoc. 10 heads per  
819 biological replicate, N=2-3). (E) Western blot for histone H3 in heads of flies carrying R50H05-  
820 GAL>UAS-CsChrimson or UAS-CsChrimson/w-;CS controls exposed to red light for 12 hours,  
821 quantified in right panel and normalized to UAS-CsChrimson/w-;CS control (one-way ANOVA.  
822 10 heads per biological replicate, N=4-5).

823

824

825

826

827

828

829

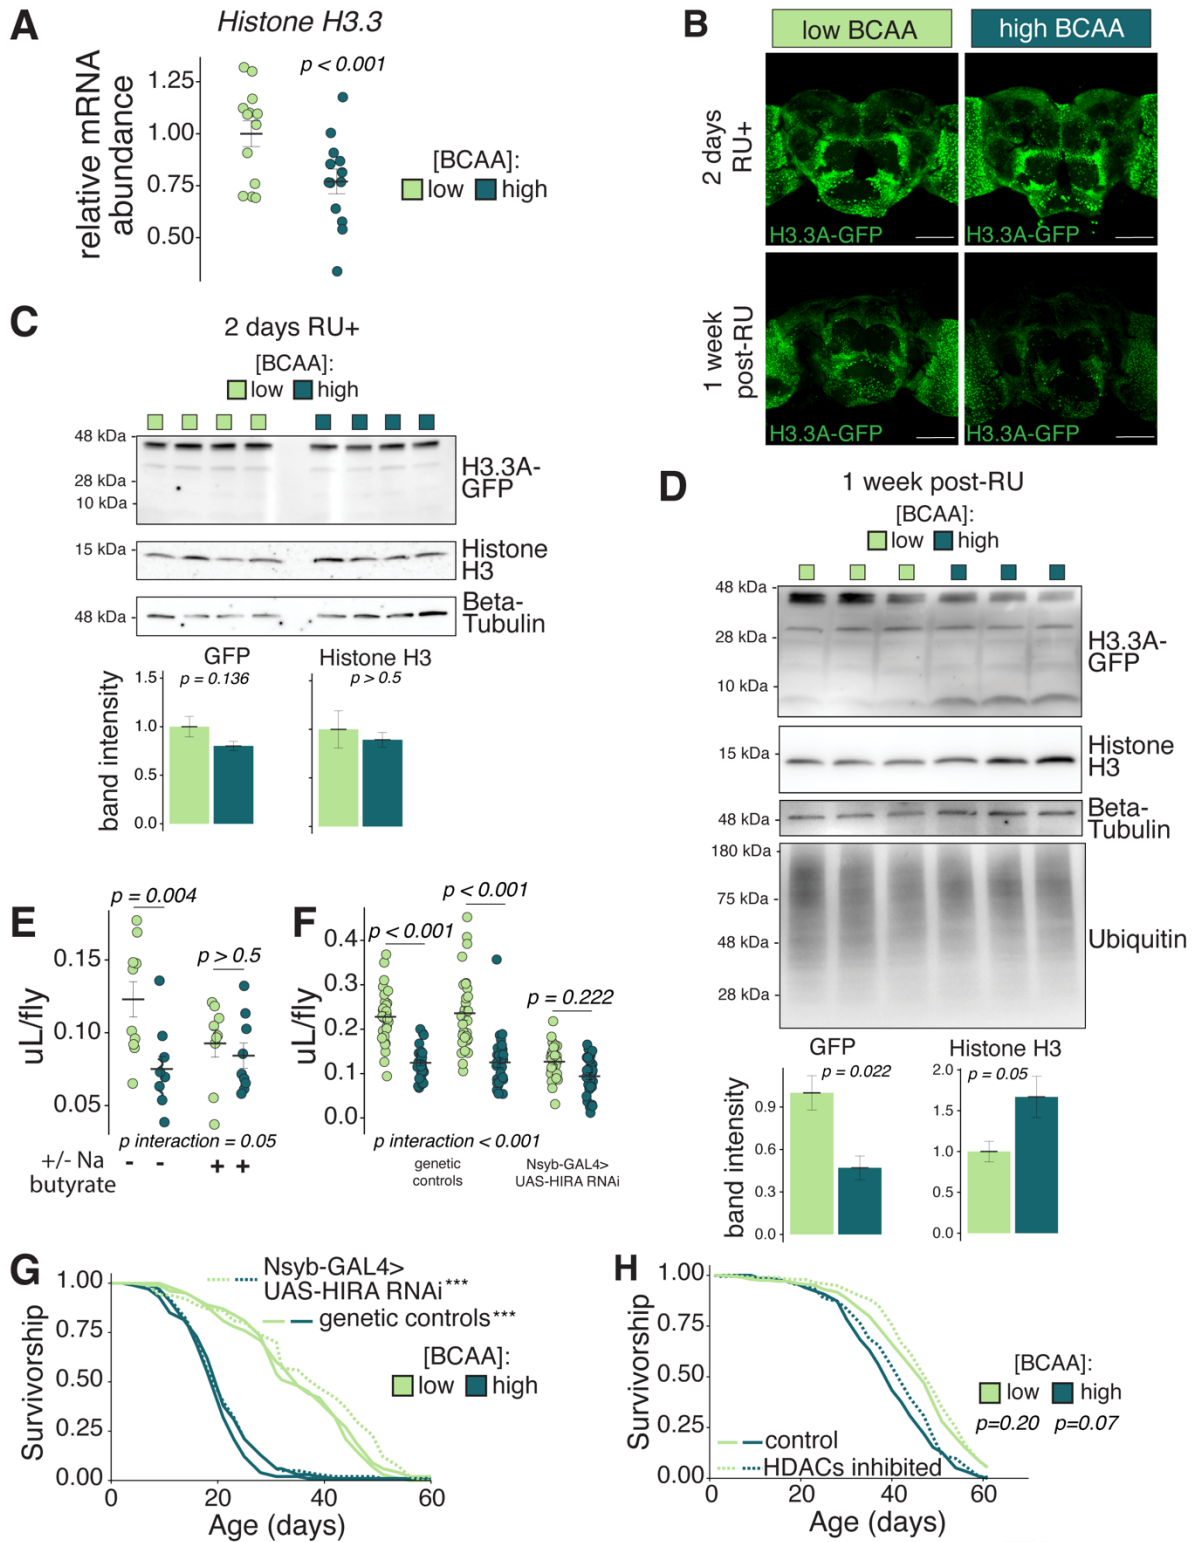

Figure 3

830

831

832 **Figure 3. Utilization of the histone variant H3.3A in the brain is modulated by BCAAs to**  
833 **stimulate feeding but is not required to extend lifespan. (A)** RT-qPCR quantification of  
834 relative mRNA abundance of *H3.3A* in *Canton-S* heads after 5-7 days on low- vs. high-BCAA  
835 diet, values are normalized to low-BCAA treatment (one-way ANOVA, 10 heads per biological  
836 replicate, experimental replicates are pooled). **(B-D)** Pulse-chase of fluorescently labelled H3.3A  
837 in brains (B) or heads (C-D) of flies carrying *Nsyb-GeneSwitch-GAL4>H3.3A-GFP* on low- or  
838 high-BCAA diets. (B) Representative confocal images of brains immediately following the 2-day  
839 pulse of H3.3A-GFP induced by BCAA food + RU486 (top panel) and 1 week after the pulse  
840 (bottom panel). Scale bar 100µm. (C) Western blot of H3.3A-GFP (predicted molecular weight =  
841 42 kDa) and histone H3 immediately following the 2-day pulse of H3.3A-GFP induced by  
842 BCAA food + RU486, quantified in bottom panel (one-way ANOVA, 10 heads per biological  
843 replicate). (D) Western blot of H3.3A-GFP (one-way ANOVA), histone H3 (one-tailed Student's  
844 t-test), and ubiquitin (one-way ANOVA,  $p=0.571$ ) 1 week after the H3.3A-GFP pulse, quantified  
845 in bottom panel (10 heads per biological replicate). **(E)** Con-Ex measurement of 24-hr food  
846 intake after 5 days on BCAA diets +/- 100 mM sodium butyrate (two-way ANOVA with  
847 Tukey's post-hoc). **(F)** Con-Ex measurement of 24-hr food intake after 5-7 days on BCAA diets  
848 from flies carrying *Nsyb-GAL4>UAS-HIRA RNAi* or controls (*Nsyb-GAL4/w-;CS* and *UAS-*  
849 *HIRA RNAi/w-;CS*) (two-way ANOVA with Tukey's post-hoc, experiment replicates are  
850 pooled). **(G)** Lifespans of flies carrying *Nsyb-GAL4>UAS-HIRA RNAi* or controls (*Nsyb-*  
851 *GAL4/w-;CS* and *UAS-HIRA RNAi/w-;CS*) (log-rank test, N=184-202). **(H)** Lifespan of flies on  
852 BCAA diets +/- 100 mM sodium butyrate (log-rank test, N=186-196).

853

854

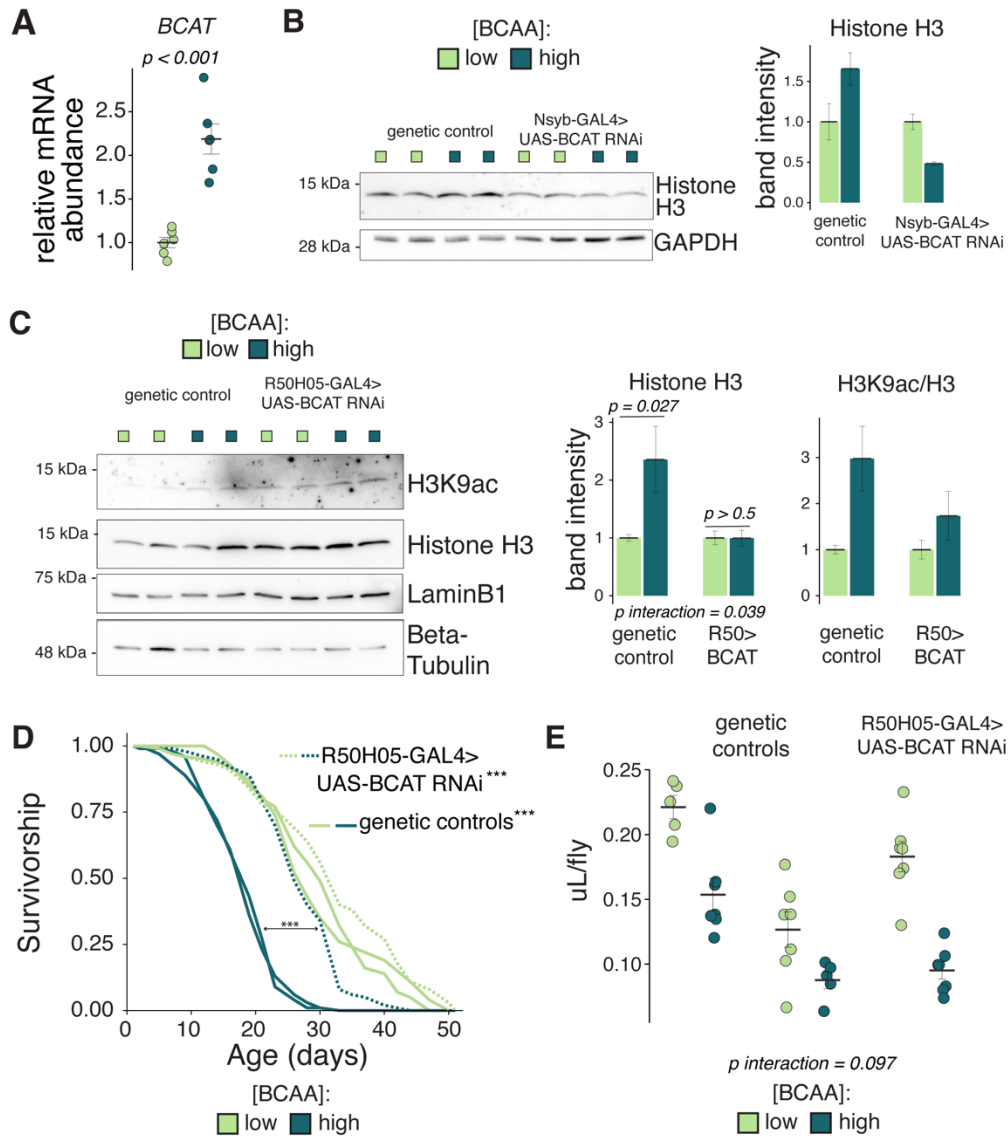

Figure 4

855

856

857 **Figure 4. Hunger neurons use BCAA metabolism to regulate histone abundance and**  
858 **modulate lifespan independent of feeding. (A)** RT-qPCR quantification of relative mRNA  
859 abundance of *BCAT* (*CG1673*) in *Canton-S* heads after 5-7 days on BCAA diets, values are  
860 normalized to low-BCAA treatment (one-way ANOVA, 10 heads per biological replicate). **(B)**  
861 Western blot of histone H3 in heads of flies carrying *Nsyb-GAL4>UAS-BCAT RNAi* or control  
862 (*Nsyb-GAL4/w-;CS*), quantified in right panel and normalized to low-BCAA treatment (two-way  
863 ANOVA with Tukey's post-hoc, N=2). **(C)** Western blot of histone H3 and H3K9ac in heads of  
864 flies carrying *R50H05-GAL4>UAS-BCAT RNAi* or control (*R50H05-GAL4/w-;CS*), quantified in  
865 right panel (two-way ANOVA with Tukey's post-hoc, experimental replicates pooled, N=5). **(D)**  
866 Lifespans of flies carrying *R50H05-GAL4>UAS-BCAT RNAi* or controls (*R50H05-GAL4/w-;CS*  
867 or *UAS-BCAT RNAi/w-;CS*) on low- or high-BCAA diets (log-rank test, N=91-100,  
868 \*\*\*p<0.001,). **(E)** Con-Ex measurement of 24-hr food intake after 5 days on BCAA diets in flies  
869 carrying *R50H05-GAL4>UAS-BCAT RNAi* or controls (*R50H05-GAL4/w-;CS* or *UAS-BCAT*  
870 *RNAi/w-;CS*) (two-way ANOVA).

871

872

873

874

875

876

877

878

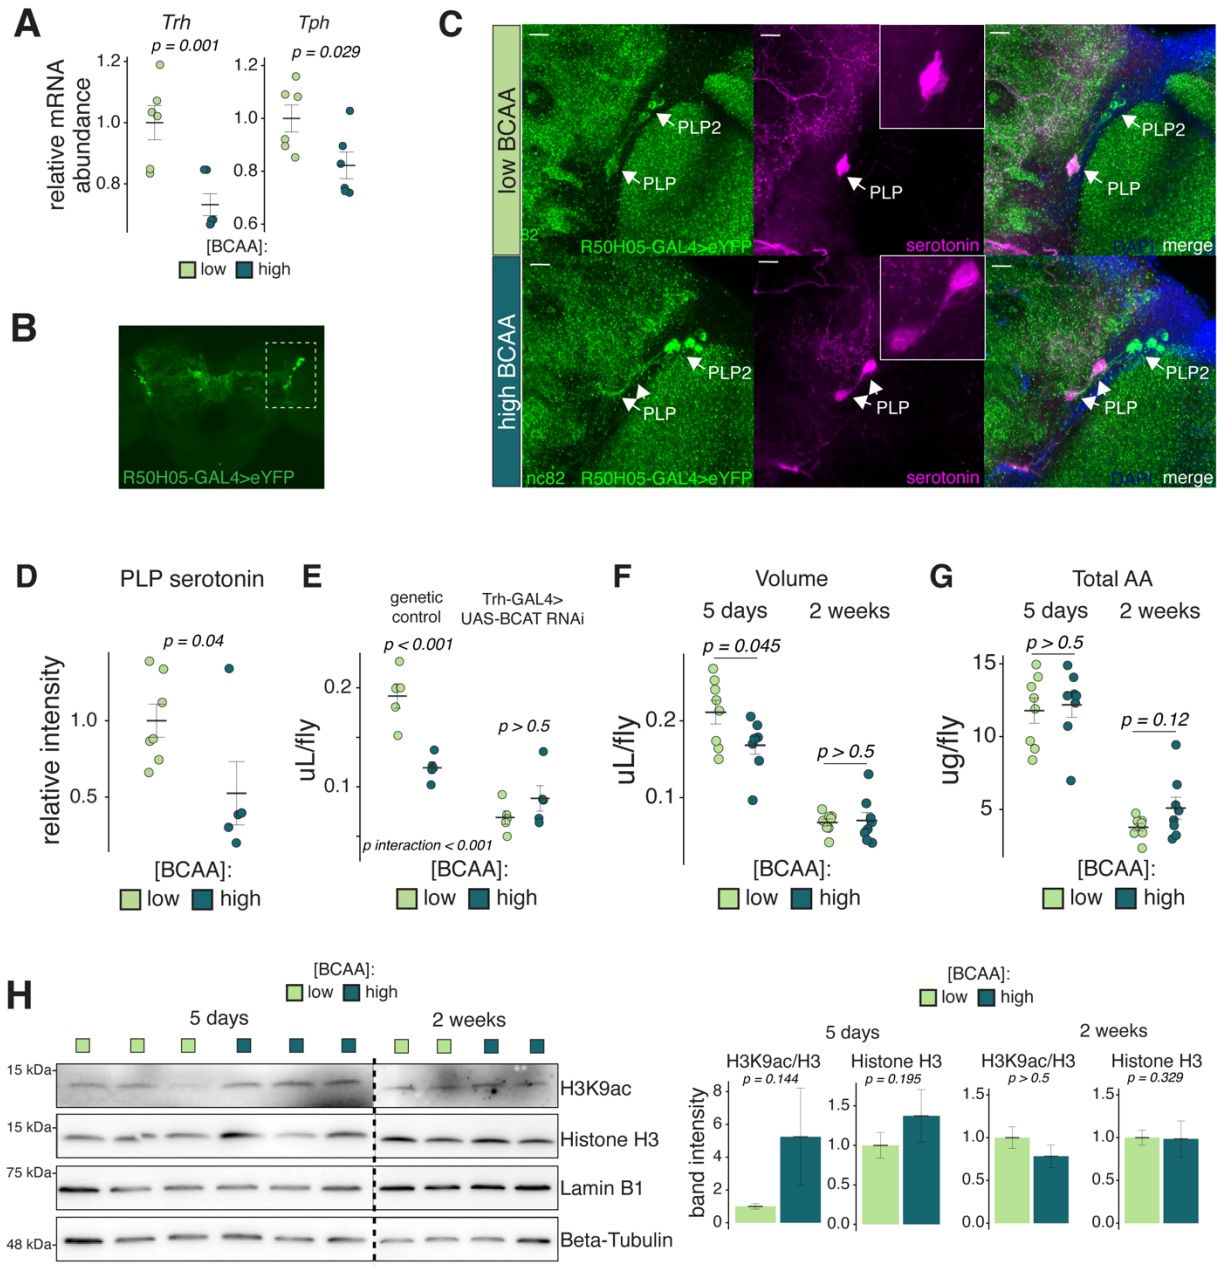

Figure 5

879

880



881 **Figure 5. Spatially and temporally distinct processes link hunger to feeding and aging. (A)**  
882 RT-qPCR quantification of relative mRNA abundance of *Trh* and *Tph* in *Canton-S* heads after 5-  
883 7 days on BCAA diets, values are normalized to low-BCAA treatment (one-way ANOVA. 10  
884 heads per biological replicate). **(B-D)** Immunostaining for serotonin in PLP neuron cell-bodies in  
885 flies carrying *R50H05-GAL4>UAS-GTACR.eYFP* after 5-7 days on BCAA diets. (B) Maximum  
886 intensity projection of ten 1.5  $\mu\text{m}$  stacks highlighting the PLP neurons (white box) in the  
887 posterior fly brain. Scale bar 100 $\mu\text{m}$ . (C) Representative confocal images of immunostaining for  
888 serotonin in PLP neurons of flies carrying *R50H05-GAL4>UAS-GTACR.eYFP* (green=nc82,  
889 magenta=serotonin, blue=DAPI, scale bar=10 $\mu\text{m}$ ). Images are maximum intensity projections of  
890 ten 1.5  $\mu\text{m}$  stacks through the PLP neurons (D) Quantification of (C) as described in Methods  
891 (one-way ANOVA, experimental replicates are pooled). **(E)** Con-Ex measurement of 24-hr food  
892 intake after 5 days on BCAA diets in flies carrying *Trh-GAL4>UAS-BCAT RNAi* or control  
893 (*Trh-GAL4/w-;CS*) (two-way ANOVA). **(F-G)** Con-Ex measurement of 24-hr food intake after 5  
894 days or 2 weeks on BCAA diets in *Canton-S* flies; volume (F) and total amino acid intake (G)  
895 (two-tailed Student's t-test). (H) Western blot of histone H3 and H3K9ac in heads of *Canton-S*  
896 flies after 5 days vs. 2 weeks on BCAA diets, quantified in right panel (one-tailed Student's t-  
897 tests, 10 heads per biological replicate, experimental replicates are pooled, N=3-5).

898

899

900

901

902

903

1  
2  
3  
4  
5  
6  
7  
8  
9  
10  
11  
12  
13  
14  
15  
16

**Supplementary Materials for**  
**Encoding of hunger by the neuronal epigenome slows aging in *Drosophila***

Weaver, KJ<sup>1</sup>, Holt, RA<sup>2</sup>, Henry, E<sup>3</sup>, Pletcher, SD<sup>1</sup>

Correspondence to: [spletch@umich.edu](mailto:spletch@umich.edu), [kjweaver@umich.edu](mailto:kjweaver@umich.edu)

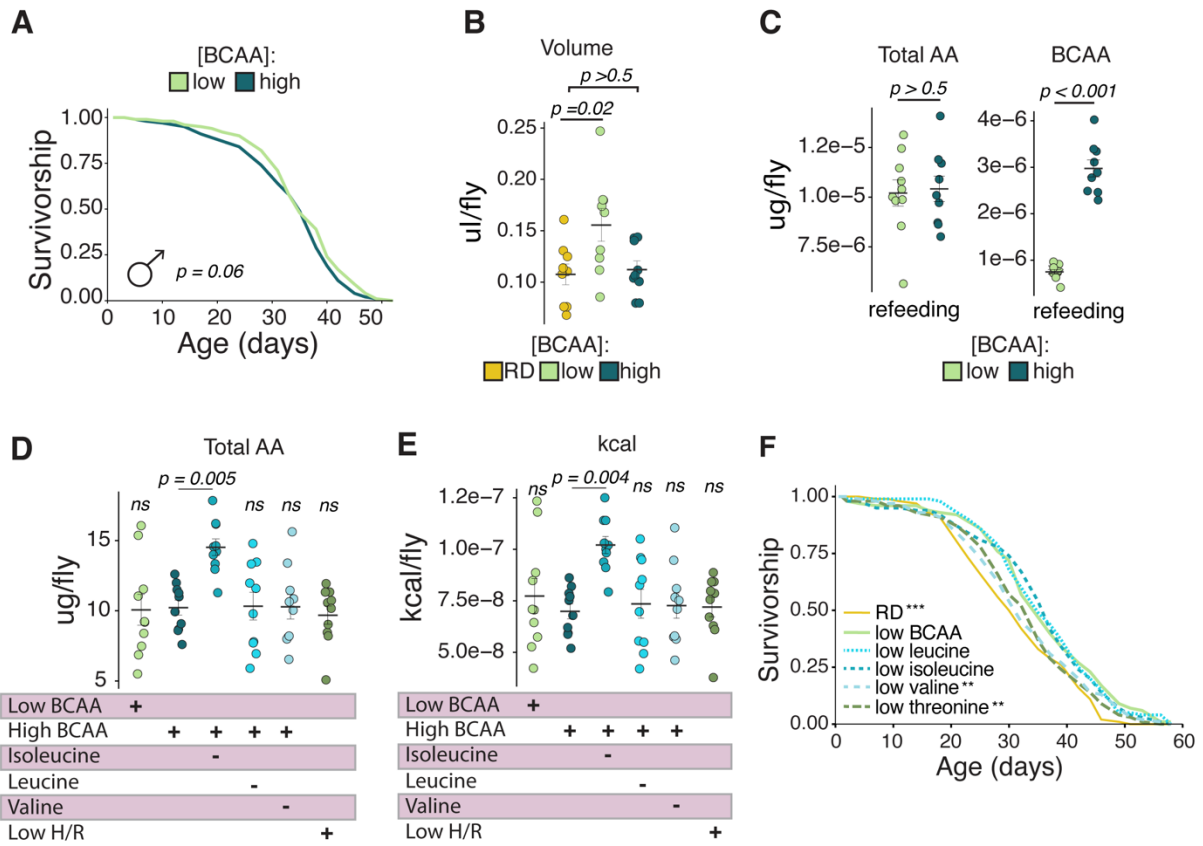

Figure S1

17

18

19 **Figure S1. Isoleucine is necessary and sufficient to increase feeding and modulate aging.**  
20 **(A)** Lifespan of male *Canton-S* flies on low- or high-BCAA diets, related to Figure 1B (log-rank  
21 test, N= 217-231). **(B)** Total volume consumed by female *Canton-S* flies on RD, low-, or high-  
22 BCAA diets for 1 week (one-way ANOVA with Tukey's post-hoc). **(C)** Total amino acid and  
23 BCAA consumed during 3-hour refeeding low- or high-BCAA food, related to Figure 1I (one-  
24 way ANOVA). **(D-E)** Total amino acid **(D)** and kcal **(E)** consumed by *Canton-S* flies on  
25 indicated diets, related to Figure 1J. **(F)** Lifespans of *Canton-S* flies on indicated diets (log-rank  
26 test, p-values derived by comparison to low-BCAA, N=170-177, \*\*p<0.01, \*\*\*p<0.001).

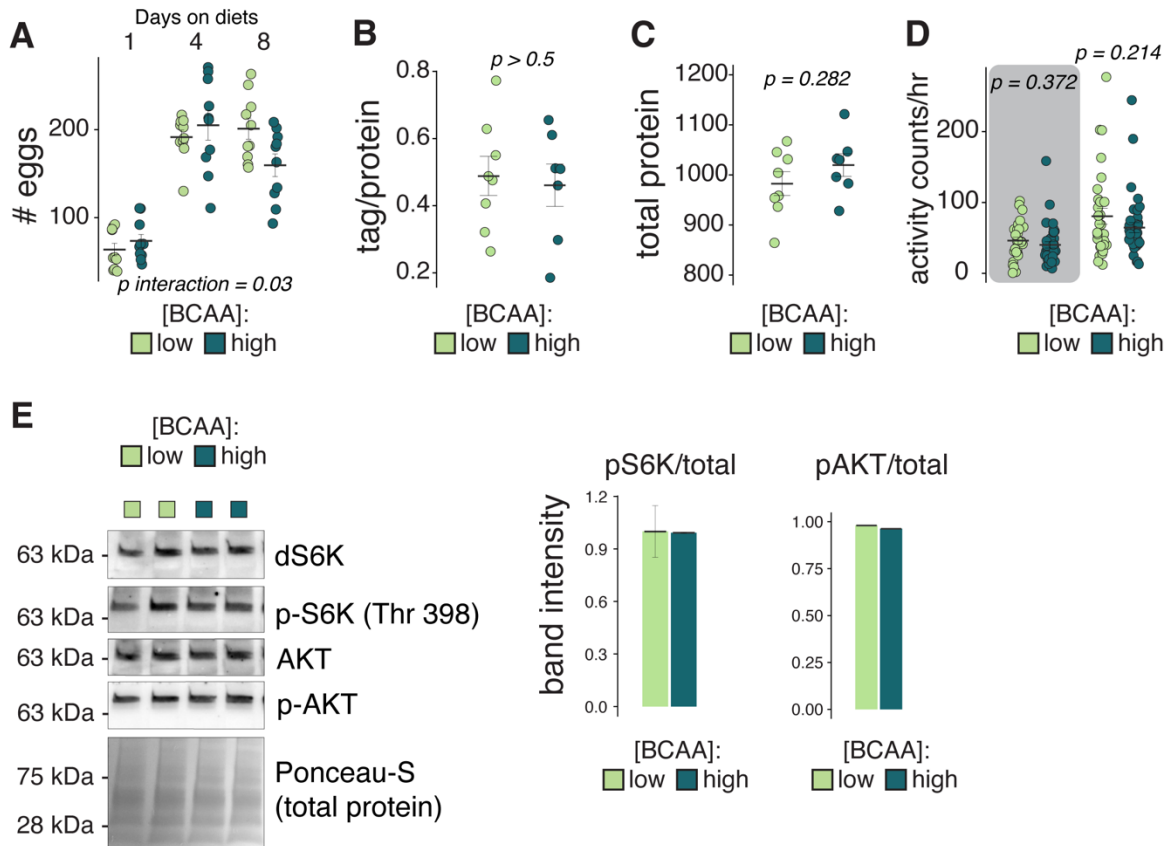

Figure S2

27

28

29 **Figure S2. Physiological measures typically associated with aging are unchanged by dietary**  
30 **BCAAs. (A)** Eggs laid by *Canton-S* flies on indicated diets after 1, 4, or 8 days on diet (two-way  
31 ANOVA). **(B)** Total triacylglycerides in *Canton-S* flies after 1 week on BCAA diets (one-way  
32 ANOVA, 2 flies per biological replicate). **(C)** Total protein in *Canton-S* flies after 1 week on  
33 BCAA diets (one-way ANOVA, 2 flies per biological replicate). **(D)** Total activity counts of  
34 *Canton-S* flies after 5 days on BCAA diets during dark (left) and light (right) period (one-way  
35 ANOVAs). **(E)** Western blot and quantification of S6K and AKT activation in heads of *Canton-*  
36 *S* flies after 1 week on BCAA diets (N=2).

37

38

39

40

41

42

43

44

45

46

47

48

49

50

51

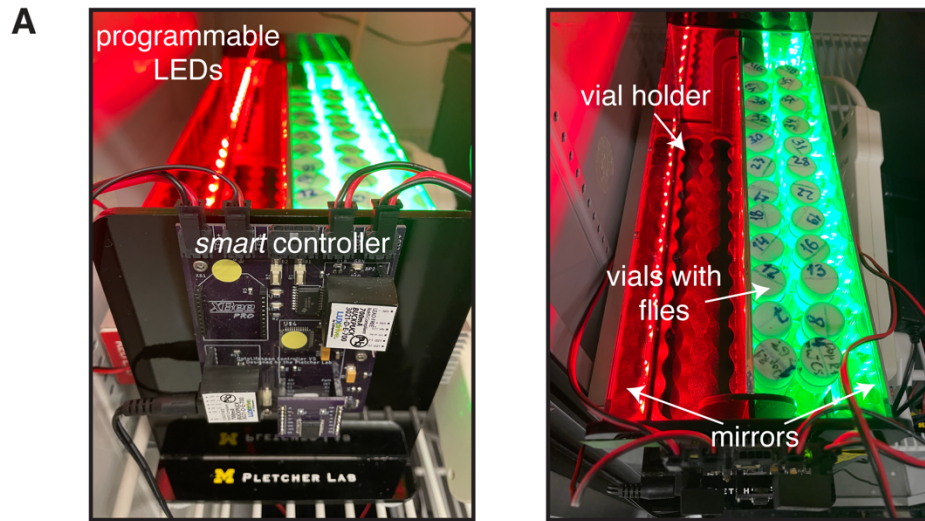

Figure S3

53 **Figure S3. Custom rig for optogenetic experiments. (A)** Representative rig used for  
54 optogenetic lifespan and Con-Ex experiments. Details can be found in methods.



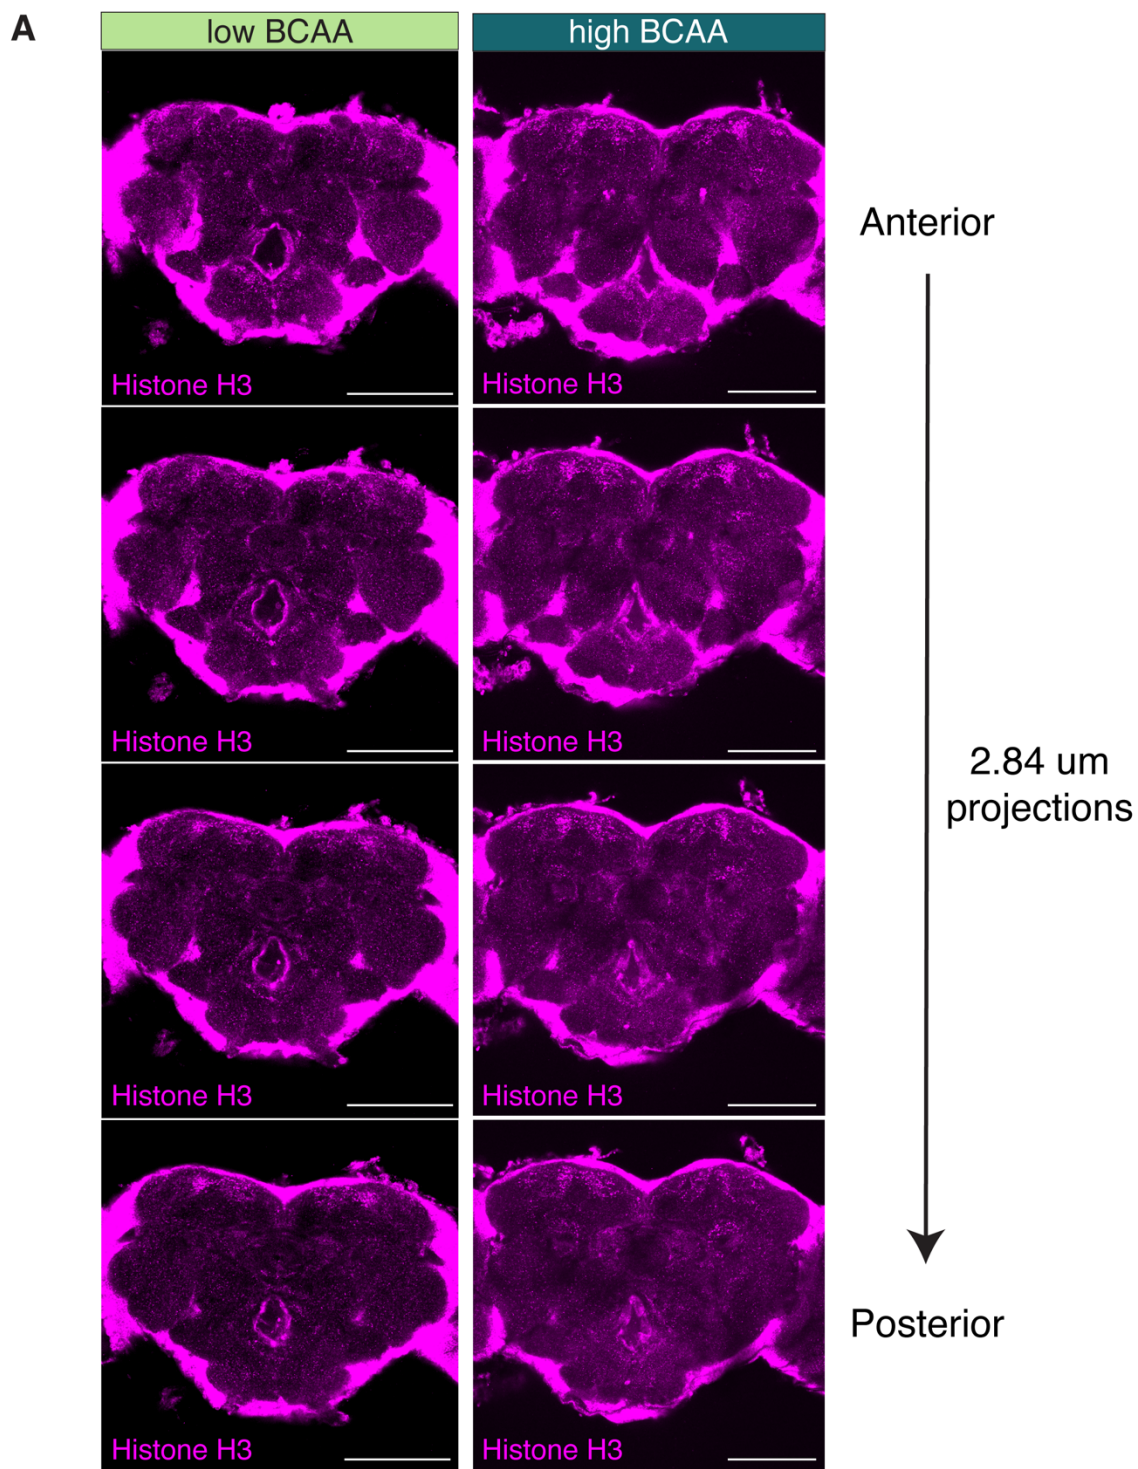

Figure S4

55

56

57 **Figure S4. Histone H3 abundance is modulated by dietary BCAAs in discrete anatomical**  
58 **locations. (A)** Immunostaining for histone H3 in *Canton-S* flies after 5-7 days on BCAA diets.  
59 Representative images are montages of maximum intensity projections through the central brain,  
60 each consisting of two 1.42 $\mu$ m stacks (scale bar = 100 $\mu$ m).

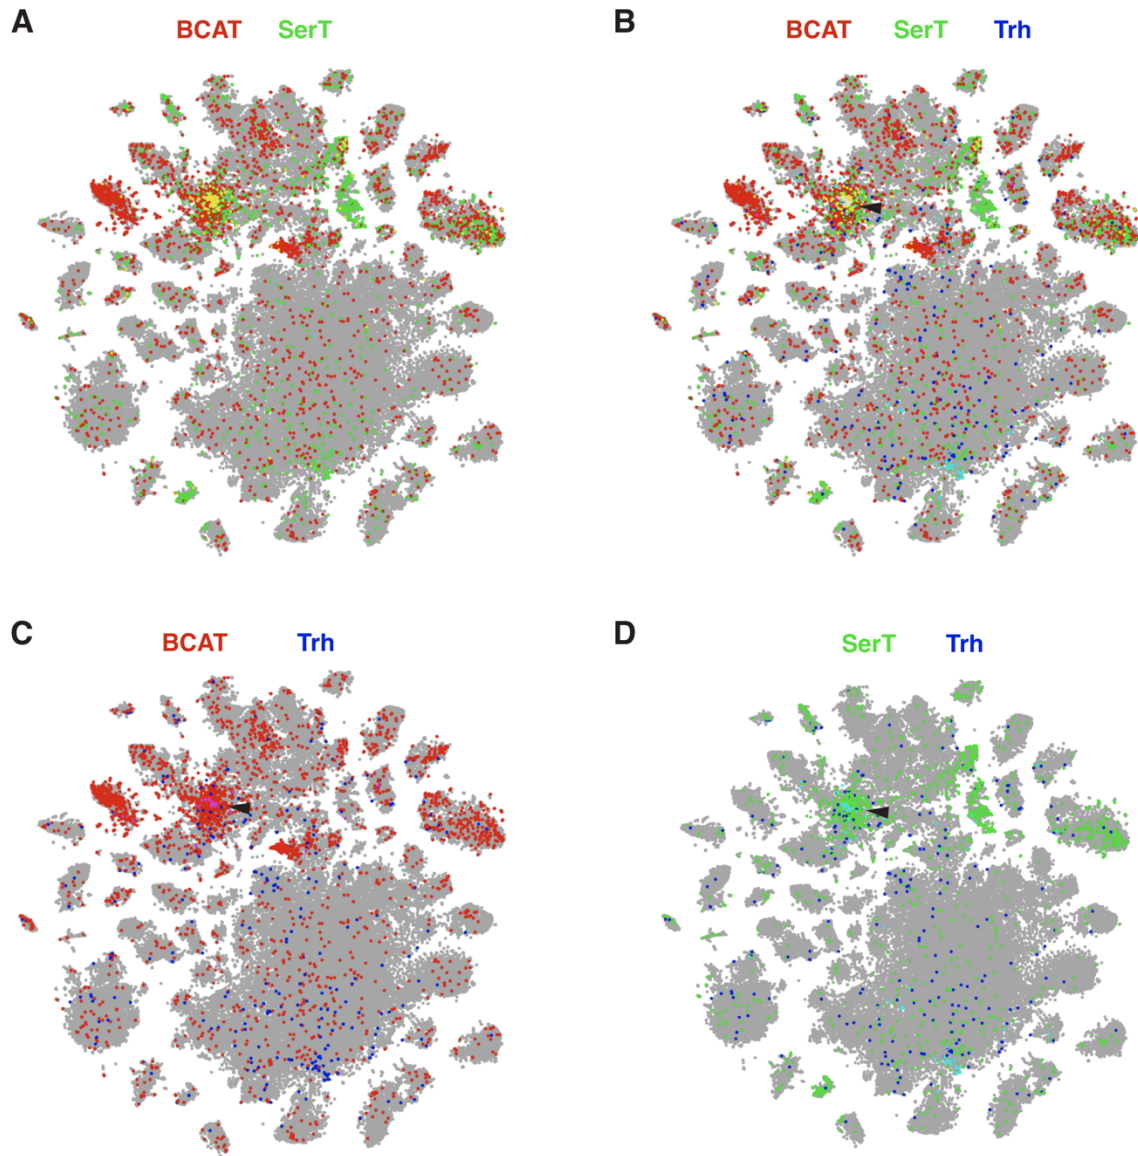

Figure S5

61

62

63 **Figure S5. tSNE plots of single-cell gene expression in fly heads. (A-D)** tSNE plots from the  
64 Fly Cell Atlas ([www.flycellatlas.org](http://www.flycellatlas.org)) generated using the publicly available 10x droplet based  
65 single-cell sequencing dataset from fly heads and visualized using SCoPe<sup>47</sup>. **(A)** Cells that  
66 express *BCAT* (red) and *SerT* (green) with a cluster of co-expressing cells shown in yellow  
67 (approximately 80 cells were detected to express both *BCAT* and *SerT*). **(B)** Cells that express  
68 *BCAT* (red), *SerT* (green), *Trh* (blue), and co-expressing cells shown in white and highlighted  
69 with arrowhead. **(C)** Cells that express *BCAT* (red) or *Trh* (blue) and co-expressing cells shown  
70 in pink. **(D)** Cells that express *SerT* (green) or *Trh* (dark blue) and co-expressing cells shown in  
71 light blue.

72

73

74

75

76

77

78

79

80

81

82

83

84

85

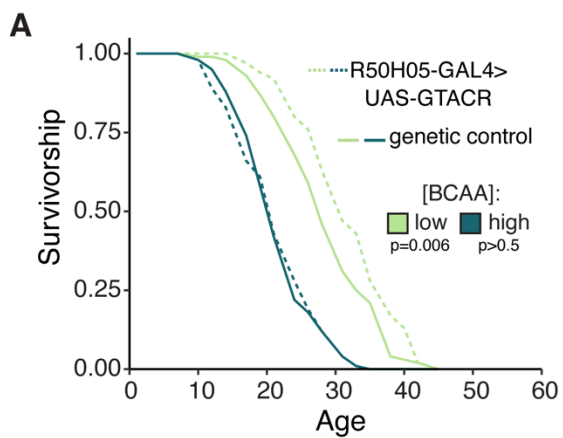

Figure S6

86

87

88 **Figure S6. Lifespan of flies with optogenetic inhibition of R50 hunger neurons.** Flies  
89 carrying *R50H05-GAL4>UAS-GTACR* or *UAS-GTACR/w-;CS* as control were aged on low- or  
90 high-BCAA diets and exposed to 530nm light constantly for the duration of the experiment (log-  
91 rank test, N=93-100).  
92

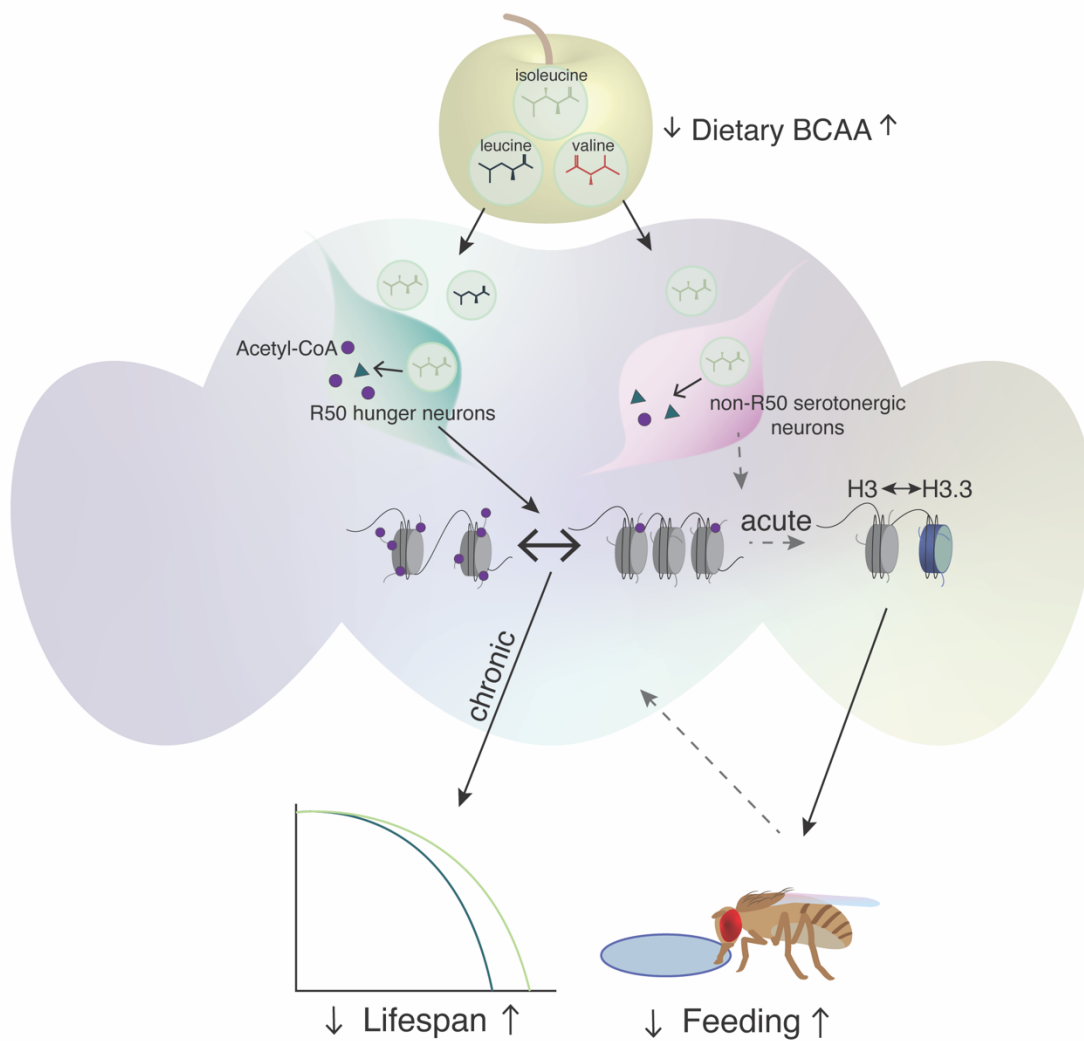

Figure S7

93  
94 **Figure S7. Proposed model. The motivational state of hunger modulates feeding and aging**  
95 **via distinct pathways.**  
96

97  
98

Table S1. Composition of diets used for experiments

| Diet/<br>Component                 | Yaa<br>(Piper, et<br>al.) | RD    | Low<br>BCAA | High BCAA | High BCAA<br>–Isoleucine | High BCAA<br>– Leucine | High BCAA<br>– Valine | Low BCAA<br>+ Isoleucine | Low Histidine/<br>Arginine |
|------------------------------------|---------------------------|-------|-------------|-----------|--------------------------|------------------------|-----------------------|--------------------------|----------------------------|
| Total volume (l)                   | 1                         | 1     | 1           | 1         | 1                        | 1                      | 1                     | 1                        | 1                          |
| Agar (g)                           | 7                         | 11.25 | 11.25       | 11.25     | 11.25                    | 11.25                  | 11.25                 | 11.25                    | 11.25                      |
| Isoleucine (g)                     | 1.16                      | 3.48  | 1.16        | 5.8       | 1.16                     | 5.8                    | 5.8                   | 5.8                      | 3.48                       |
| Leucine (g)                        | 1.64                      | 4.92  | 1.64        | 8.2       | 8.2                      | 1.64                   | 8.2                   | 1.64                     | 4.92                       |
| Valine (g)                         | 1.33                      | 3.99  | 1.33        | 6.65      | 6.65                     | 6.65                   | 1.33                  | 1.33                     | 3.99                       |
| Tyrosine (g)                       | 0.84                      | 2.52  | 2.52        | 2.52      | 2.52                     | 2.52                   | 2.52                  | 2.52                     | 2.52                       |
| Sucrose (g)                        | 17.12                     | 51.36 | 51.36       | 51.36     | 51.36                    | 51.36                  | 51.36                 | 51.36                    | 51.36                      |
| Cholesterol<br>solution (ml)       | 15                        | 15    | 15          | 15        | 15                       | 15                     | 15                    | 15                       | 15                         |
| CaCl <sub>2</sub> (1000X, ml)      | 1                         | 1     | 1           | 1         | 1                        | 1                      | 1                     | 1                        | 1                          |
| MgSO <sub>4</sub> (1000X, ml)      | 1                         | 1     | 1           | 1         | 1                        | 1                      | 1                     | 1                        | 1                          |
| CuSO <sub>4</sub> (1000X, ml)      | 1                         | 1     | 1           | 1         | 1                        | 1                      | 1                     | 1                        | 1                          |
| FeSO <sub>4</sub> (1000X, ml)      | 1                         | 1     | 1           | 1         | 1                        | 1                      | 1                     | 1                        | 1                          |
| ZnSO <sub>4</sub> (1000X, ml)      | 1                         | 1     | 1           | 1         | 1                        | 1                      | 1                     | 1                        | 1                          |
| Acetate buffer<br>(10X, ml)        | 100                       | 100   | 100         | 100       | 100                      | 100                    | 100                   | 100                      | 100                        |
| Nucleic acids/lipids<br>(125X, ml) | 8                         | 8     | 8           | 8         | 8                        | 8                      | 8                     | 8                        | 8                          |
| EAA solution (ml)                  | 60.51                     | 181.5 | 181.5       | 181.5     | 181.5                    | 181.5                  | 181.5                 | 181.5                    | 181.5                      |
| NEAA solution (ml)                 | 60.51                     | 181.5 | 181.5       | 181.5     | 181.5                    | 181.5                  | 181.5                 | 181.5                    | 181.5                      |
| Glutamate solution<br>(ml)         | 18.21                     | 54.5  | 54.5        | 54.5      | 54.5                     | 54.5                   | 54.5                  | 54.5                     | 54.5                       |
| Cysteine solution<br>(ml)          | 5.28                      | 15.5  | 15.5        | 15.5      | 15.5                     | 15.5                   | 15.5                  | 15.5                     | 15.5                       |
| Vitamin solution<br>(47.6X, ml)    | 21                        | 21    | 21          | 21        | 21                       | 21                     | 21                    | 21                       | 21                         |
| Folic acid (1000X,<br>ml)          | 1                         | 1     | 1           | 1         | 1                        | 1                      | 1                     | 1                        | 1                          |
| Propionic acid (ml)                | 6                         | 6     | 6           | 6         | 6                        | 6                      | 6                     | 6                        | 6                          |
| Tegosept (ml)                      | 15                        | 15    | 15          | 15        | 15                       | 15                     | 15                    | 15                       | 15                         |

99

100

101

102

103

104

105

106

107

108

109

110

111

112

113

114

115

116

117

118

119

120

121

122

123

124



125  
126

Table S2. Concentration of amino acid stock solutions used in diets

|                                  | BCAA diets (g/200ml)               | Low Histidine/Arginine (g/200ml)   |
|----------------------------------|------------------------------------|------------------------------------|
| <b>Essential Amino Acids</b>     |                                    |                                    |
| F (L-phenylalanine)              | 3.03                               | 3.03                               |
| H (L-histidine)                  | 2.24                               | 0.746                              |
| K (L-lysine)                     | 5.74                               | 5.74                               |
| M (L-methionine)                 | 1.12                               | 1.12                               |
| R (L-arginine)                   | 4.7                                | 1.566                              |
| T (L-threonine)                  | 4.28                               | 4.28                               |
| W (L-tryptophan)                 | 1.45                               | 1.45                               |
| <b>Non-essential Amino Acids</b> |                                    |                                    |
| A (L-alanine)                    | 5.25                               | 5.25                               |
| D (L-aspartate)                  | 2.78                               | 2.78                               |
| G (glycine)                      | 3.58                               | 3.58                               |
| N (L-asparagine)                 | 2.78                               | 2.78                               |
| P (L-proline)                    | 1.86                               | 1.86                               |
| Q (L-glutamine)                  | 6.02                               | 6.02                               |
| S (L-serine)                     | 2.51                               | 2.51                               |
| C (L-cysteine)                   | 2.5                                | 2.5                                |
| E (L-glutamate, Na salt)         | 5                                  | 5                                  |
| <b>Added as solid</b>            |                                    |                                    |
| I (L-isoleucine)                 | (g/l)<br>See Extended Data Table 1 | (g/l)<br>See Extended Data Table 1 |
| L (L-leucine)                    | See Extended Data Table 1          | See Extended Data Table 1          |
| V (L-Valine)                     | See Extended Data Table 1          | See Extended Data Table 1          |
| Y (L-tyrosine)                   | 2.52                               | 2.52                               |

127

128

129

130

131

132

133

134

135

136

137

138

139

140
